# Supplementary material for: A Human-Like Senescence-Associated Secretory Phenotype Is Conserved in Mouse Cells Dependent on Physiological Oxygen
Source: PLoS One. 2010 Feb 12;5(2):e9188. doi: 10.1371/journal.pone.0009188 (PMC2820538; doi:10.1371/journal.pone.0009188)
Supplement: Dataset S1 — Mouse Secretome: Computational analysis of antibody array data presented in Fig. 1 and Fig. S1 (PRE, SEN(XRA), SEN(OXI), and IM mouse fibroblasts cultured in 3% and 20% oxygen condition) The first spreadsheet (“mouse data_raw_ave_fold”) is composed of six main blocks: column A-AT lists the raw antibody array read outs of all 45 mouse cell samples (62 factors); column AW-BK lists the average values for each different group of samples; column BN-CE lists fold average values against the mean within each cell strain; column CH-CY is the log2 of column BN-CE; column DB-EU lists fold of all raw values against the mean of each cell strain; column EX-GQ is the log2 fold of column DB-EU. The second spreadsheet (“mouse data_ttest_log2fold”) lists in column A-AT the data log2 fold of all raw values against the mean of each cell strain (that is column EX-GQ from the first spreadsheet), and calculates in column AV-AY the significance (Student t-test) of variation between subpopulations of interest; finally, the log2 fold average values against the mean of each cell strain (extracted from the column CH-CY in the first spreadsheet) are reorganized as represented in Fig. S1. The third spreadsheet (“Fig. 1A”) extracts only the significant variations from the second spreadsheet (as listed in Fig. 1A). The fourth spreadsheet (“Fig. 1C”) extracts data from the two first spreadsheets and compare directly the SEN(XRA) and SEN(OXI) secretomes. The fifth spreadsheet (“Fig. S1”) rearranges the data as presented in Fig. S1. These data can be used for clustering and correlative analysis. (0.42 MB XLS) [file pone.0009188.s007.xls]

## Sheet: mouse data_raw_ave_fold 
RAW ANTIBODY ARRAY DATA	MBF IM 20	MBF IM 20	MBF IM 20	MBF P 20	MBF P 20	MBF P 20	MBF P 20	MBF P 3	MBF P 3	MBF P 3	MBF P 3	MBF P 3	MBF S 20_oxi	MBF S 20_oxi	MBF S 20_oxi	MBF S 3_xra	MBF S 3_xra	MBF S 3_xra	MBF S 3_xra	MEF IM 20	MEF IM 20	MEF IM 3	MEF P 20	MEF P 20	MEF P 20	MEF P 20	MEF P 20	MEF P 3	MEF P 3	MEF P 3	MEF P 3	MEF P 3	MEF P 3	MEF P 3	MEF S 20_oxi	MEF S 20_oxi	MEF S 20_oxi	MEF S 20_oxi	MEF S 20_oxi	MEF S 20_xra	MEF S 3_xra	MEF S 3_xra	MEF S 3_xra	MEF S 3_xra	MEF S 3_xra			Ave value within each population of MBF or MEF	ave MBF IM 20
Ax1	1524.85	5288.05	3411.14	2601.66	4176.62	7253.85	3282.65	5725.19	2914.02	4989.75	5261.5	3427.18	1987.45	7053.66	3499.7	2277.93	5014.1	3101.74	6166.01	2206.27	3952	4715.98	4114.04	2211.87	3072.18	3346.48	3593.07	3173.77	4925.54	1993.47	5203.93	6402.47	5137.95	3964.26	3819.51	2115.5	2149.28	2581.34	4077.93	4747.28	4200.43	5825.49	5647.43	4159.14	4403.8			Ax1	3408.01
BLC	5010.33	5457.96	4759.1	5250.39	8192.88	4571.32	5976.89	3227.27	6683.85	7673.98	7198.5	7242.21	7403.23	6673.25	4990.93	6457.72	8671.5	7553.4	8061.36	1660.02	8485.89	7035.1	5530.21	8185.55	6641.23	6989.11	7821.06	840.55	8778.67	9837.6	6335.27	9594.44	7646.5	8211.61	7616.92	3921.52	7148.62	5019.03	9657.98	6299.47	7442.37	10703.6	6568.26	8714.2	8866.58			BLC	5075.8
CD30L	3159.48	4250.82	5578.02	3424.79	5659.74	4638.56	6403.01	1593.35	2524.03	5415.57	5192.73	4871.62	2211.14	7247.18	5022.23	4670.44	7396.98	6152.59	6232	517.34	5211.09	2911.6	3357.73	4197.28	6614.51	5374.14	5463.97	190.84	6106.61	3416.08	5880.66	7567.83	4690.62	6730.83	4263.95	1035.27	2183.35	4480.3	7802.43	6603.11	6751.17	6974.41	6868.17	7425.09	6112.31			CD30L	4329.44
CD30T	3391.43	4901.16	5528.55	2022.01	4593.55	4247.6	6186.56	3278.67	2699.82	12549.1	4787.45	8706.64	3590.45	5414.64	5602.06	5054.84	5540.03	5811.23	6364.72	5003.16	3625.81	8414.33	2915.35	3047.41	5014.92	3632.33	4551.86	5315.71	5782.34	2321.2	5300.4	5230.59	4876.58	4396.33	2990.2	3336.55	5579.25	2929.04	5346.19	4373.62	5140	5035.24	4718.38	6134.86	3997.15			CD30T	4607.05
CD40	561.53	2349.8	3288.53	1138.77	1692.04	2549.19	2894.52	3649.74	2874.87	1930.31	2526.76	2881.58	3189.16	3612.49	2025.59	3269.35	3129.9	1608.47	5356.91	2550.75	2132.81	2249.55	2507.72	1854.75	1869.91	2889.37	3053.33	2174.24	5269.58	600.26	2734.4	2243.75	3176.33	3249.07	3381.93	1085.28	3845.18	1800.87	3304.5	2920	4823.34	3297.86	3103.34	5130.12	4113.95			CD40	2066.62
CRG-2	2706.35	5620.71	6630.57	4881.93	7199.31	4553.32	8026.5	4767.38	4250.97	6355.73	5660.31	9634.89	3982.96	7218.58	5857.07	5992.11	8586.43	8829.16	8124.79	1634.92	4787.33	4374.73	4296.43	3509.86	4523.78	5069.97	4558.82	3282.21	7065.86	3277.41	8544.83	8656.71	3897.93	4445.38	5920.04	3175.26	4173.48	2731.52	4984.44	5865.61	6741.32	5174.89	5589.2	4963.56	5155.03			CRG-2	4985.88
CTACK	21309.7	23828.2	19905.8	12501.8	26697	24388.3	28931.2	6346.18	11619	24640.8	20978.7	31206.3	14199.6	25392.1	21877	23919.3	30131.8	28821	29363.2	4526.1	31451	7338.84	13450	13967	38919.5	44261.6	33283	6046.32	16391.6	10227.1	27676.2	32683.7	33885.6	32547.5	15737.5	10299	21237.7	10438.2	35066	30091.3	34525.2	35823	41575.2	39806.8	32954.9			CTACK	21681.2
CXCL16	25521.4	24533.2	31197.3	8589.36	25508.6	18073.9	18376.3	21729.8	10045.9	19124.8	21939.2	28962.8	11085.9	18934.2	20117.5	55913.8	58204.1	139864	80308.9	3199.7	50984.6	5623.14	10761.6	9958.12	37666.2	27303	43414.6	50375.9	12054.5	9308.28	14956.9	24312.5	27109.4	30561.4	14716	13262.8	16799.1	13996.5	29928.7	34886.1	29643.2	33052.6	65128.6	42344.5	42920			CXCL16	27084
Eotaxin	11036.8	12342.1	12463.7	3591.06	11580.9	11958.4	14674.7	5174.33	3235.39	16804.6	13644.5	22021.4	4051.32	15483.9	13299.8	20256.5	17593.3	32737	17454.7	3893.4	12800.1	5838.17	5977.53	4081.34	11543.8	11497.5	13360.5	7070.7	9004.06	5143.23	12756.9	11798.4	11894.8	13896.7	6489.2	2456.98	4773.45	4460.25	13496.4	11804.1	16357.3	16404.1	15141.5	15250.1	14616.5			Eotaxin	11947.5
Eotaxin-2	6509.93	7174.12	9404.57	4255.63	5772.71	5740.74	7966.48	3819.91	1332.01	7723.58	6826.48	5642.34	804.16	7031.88	5750.98	7634.37	7093.9	7353.47	8461.28	3397.59	8365.46	3536	2130.86	7148.41	8399.36	8175.83	6912.32	2538.53	5298.48	9356.42	6010.87	11411.9	7103.29	9204.22	7051.23	4682.79	2781.43	2715.52	8116.49	7180.53	10129.6	9515.93	9361.5	11673.9	8301.92			Eotaxin-2	7696.21
Fas Ligand	898.68	1046.05	1005.46	1895.09	1366.9	1618.05	2330.54	2556.62	3459.92	2529.25	2211.71	1105.38	2298.86	1038.11	2366.35	954.27	1353.35	2057.76	1684.99	2001.6	1181.96	3319.6	1830.87	3335.74	729.62	1462.95	1088.04	2229.04	5311.58	1889.19	1165.55	2654.35	1644.8	1206.65	4242.18	3112.41	3490.42	2533.8	2144.5	1647.03	2827.24	1202.88	2819.25	2691.9	389.19			Fas Ligand	983.397
Fractalkine	3958.95	4199.79	4647.54	4427.7	4212.71	4722.9	5069.01	3533.99	8447.77	6821.69	4947.57	4651.28	7414.5	5148.83	5491.95	5588.53	6899.2	5017.5	4967.24	1194.96	4518.8	5881.46	6148.21	8170.13	4495.08	5104.1	4636.33	3417.53	8223.11	6998.86	3362.55	8930.07	2714.38	5674.34	7782.56	5489.74	7255.83	5060.87	4627.12	3992.56	4131.12	5076.24	4567.44	6259.99	3968.14			Fractalkine	4268.76
GCSF	10351.2	9715.47	10451.9	5197.78	12134.2	6800.11	7863.64	8137.95	5079.04	14049.6	11919	9715.01	8756.1	7384.16	7794.68	9260.62	9743.09	23097.9	14364.5	2451.39	11229.5	6111.87	6314.86	7583.2	12076.2	10690.3	10150.7	8125.86	7840.59	6564.57	8197.35	16260.3	9305.77	12874	7922.08	5989.08	6514.21	6158.14	11784.7	10720.4	11371.8	12992.7	11914.4	12488	10749.3			GCSF	10172.9
GM-CSF	4079.09	4906.31	5381.58	5143.4	5686.47	5266.11	4750.58	0.73	6958.59	7517.24	7055.5	4260.05	5986.81	5065.14	5359.95	5159.94	5649.88	6192.18	6719.58	1077.95	9594.24	4369.81	4394.01	7045.74	8066.75	7053.77	7766.34	4215.46	7632.51	4190.95	5038.42	10387.3	6758.6	8367.66	5601.34	6618.61	4643.72	4238.41	7042.28	7346.64	8536.91	9855.92	8051.72	9542.59	4616.78			GM-CSF	4788.99
IFN-gamma	3680.77	4501.03	4145.55	1556.79	3900.89	5201.97	9072.59	4301.38	3619.74	6168.43	3647	4183.21	2554.77	3945.78	2560.75	3609.03	3338.27	6527.39	6463.84	2295.93	6678.41	7935.37	4559.3	4472.72	4289.5	2689.26	3513.33	3158.74	7675.19	2093.85	4350.36	9204.46	4398.57	6518.51	5168.82	3024.47	3624.27	3971.04	4282.06	4704.92	5489.78	4187.72	6490.4	5833.19	3982.43			IFN-gamma	4109.12
IGFBP-3	18897.2	19780.9	21442.5	17172	25003.8	18885.6	21357.6	7300.75	22485.6	29298.8	24634.9	26845	18733.1	20108.2	19821.1	20838.4	25473.1	23484	24633.3	7299.47	45231.8	13973.1	19914.3	18887	30222.6	28317.5	32857.6	8193.03	20899.6	20176.6	23715.5	50802	30285.5	37287.4	21692	20875	23291.6	18042.2	32210.1	37548.3	41477.7	50879.7	187089	131036	135768			IGFBP-3	20040.2
IGFBP-5	11109.1	11814.2	10400.8	5352.27	13908.6	12097.9	10976.4	25536.6	5941.71	11440.9	14275.9	11878	5855.95	12174.2	10852.4	11147.8	16015	13921.1	13132.6	5186.61	16678.7	6243.35	7225.78	7040.53	11867.4	12528.8	17796.9	14297.5	11923.1	7761.64	12995.3	19393.9	14543.5	21578.4	8797.89	6962.98	6711.27	5989.04	14562.4	14192	14871.9	17932.1	15670.1	18397.4	15688.3			IGFBP-5	11108
IGFBP-6	52286.3	41084.6	41491.8	5527.16	59940.4	44364.6	25207.2	3403.1	12840.2	43200.6	38958.1	30438.7	6861.26	41886.1	62903.4	112600	136465	96360.2	57108	3998.37	18975.6	5813.99	2138.36	4427.79	20178.2	15642.6	19274.6	3539.91	7383.22	7057.63	25679.9	74386.8	36543	36857.8	6706.77	4388.36	5939.29	4014.21	9229.5	32438	56298.5	46410.5	146765	117719	107950			IGFBP-6	44954.2
IL-10	8295.39	8668.73	6768.17	5491.65	8509.45	8944.16	9308.81	37720.3	4785.59	10870.2	8077.74	7946.98	5524.3	8759.47	9266.16	6515.66	7273.02	8315.56	8881.1	4342.4	12605.8	2368.85	5463.86	5532.3	12279.3	12507.7	14145.4	24573.1	9867.99	4942.8	7695.09	17794.1	12339.7	13439.4	4857.67	5798.47	4742.87	6199.66	13501	12286	13031.1	13839.3	14578	14147.5	12625.3			IL-10	7910.76
IL-12 p40/p70	4885.93	6063.91	3841.55	2985.97	6548.29	3346.62	6076.7	4280.68	5837.15	7708.11	6338.1	4601.19	3334.75	6446.65	5309.21	6043.27	6338.13	6241.5	7115.02	2784.72	6582.47	4864.19	3866.22	2804.6	6214.6	4975.98	7578.88	22009.5	6912.38	2053.77	4454.56	10804.3	6684.79	7599.18	5806.82	3765.25	4437.74	4862.92	5374.47	5870.92	8843.25	7374.48	7979.75	6386.23	3802.12			IL-12 p40/p70	4930.46
IL-12 p70	16332.9	17087.3	15771.1	10002.8	19892.9	18695.6	19573.2	2625.85	12876.5	24185.1	24893.9	21991.1	11197.2	18347.7	16369.8	18403.1	22088.6	24496.4	21454.9	1633.39	26595.4	1453.63	13726.2	11633.8	29284.7	25721	27181.6	0.86	16680.7	10540.4	14235.8	31525	24667.4	28027.9	13875	12986.7	14446.1	11934.1	29426.4	27068.4	26485.1	20229.1	27950.1	28622.5	29290.1			IL-12 p70	16397.1
IL-13	5911.59	6531.97	6144.68	5475.92	7584.64	8279.13	7519.3	39956	7598.38	11980.8	8671.75	8374.75	5456.43	7208.01	6796.72	6985.55	9263.41	9893.41	8604.52	1906.95	9040.61	5627.07	5777.39	6272.1	6312.09	6237.95	8755.45	38288.9	9142.58	5287.87	7965.06	13399.1	8197.37	6982.9	7410.46	7427.9	6245.08	5795.92	13461.5	8007.24	9309.06	10540.3	9868.49	8184.29	9828.47			IL-13	6196.08
IL-17	4251.41	3694.13	3298.68	2964.5	4688.5	3222.36	5264.69	0.73	4600.4	5639.95	6580.41	3856.98	3907.33	4682.55	2999.44	3304.2	4673.98	6084.6	5866.49	215.36	5443.06	2222.67	3313.48	2616.82	3594.45	5568.6	5419.7	806.56	6046.11	2694.25	5283.79	11899.2	6933.45	4846.93	5231.4	975.7	2169.92	3798.75	5364.19	5779.03	7650.71	5192.75	6271.56	6094.65	6221.95			IL-17	3748.07
IL-1a	17836.9	16770.7	14820.8	9669	20406.5	15642.5	17717.2	3411.79	11422.6	20851.4	17833	18254.8	9310.33	19318.2	14743.8	12633.9	20866.8	23313.2	21346.2	3686.18	23170.8	7186.28	10686.2	11267.1	20623.7	23288.7	22613.3	6441.15	11429.5	10185.7	16989.3	28766.4	23168.3	23251.3	12486.9	11488	16452.1	10410.6	24380.4	23468.5	25500.5	22175.3	27406.7	27336	24116.8			IL-1a	16476.1
IL-1b	3279.96	3965	2377.96	1188.48	5239.74	3762.14	3041.88	2025.35	2000.1	3455.23	3731.14	3194.07	3184.06	4152.42	2265.23	2871.15	4328.08	4804.3	5440.27	3134.45	3581.91	3858.04	2543.44	2977.53	3944.04	3203.46	3757.04	1689.18	4294.9	2051.3	4132.73	6991.64	1737.03	3344.43	3630.73	2465.01	4634.81	3671.43	3951.22	3311.22	5564.97	3788.78	4688.9	5825.89	4835.44			IL-1b	3207.64
IL-2	3390.05	2551.49	3037.97	1386.92	3889.28	2802.27	3175.31	0.73	2435.66	5078.57	3917.67	4796.89	2098.52	2632.34	2758.25	3386.89	3708.63	5147.3	5661.64	1366.79	4685.53	3052.16	1234.03	1800.08	4989.68	4428.45	4163.42	1639.42	5565.5	523.74	3211.57	7354.24	3758.65	4271.84	2286.75	2217.35	2327.11	2256.56	8571.3	3933.18	4504.7	6044.92	4867.95	3814.23	3766.75			IL-2	2993.17
IL-3	5113.96	5748.84	6615.66	2081.53	5725.76	4203.84	5428.34	1255.19	2016.08	7457.17	5996.73	6540.62	1209.14	5844.56	5565.92	4313.49	6014.9	7446.51	7264.1	1701.88	4280.84	3083.59	2372.4	1499.89	3969.57	5246.97	4985.74	2873.3	5003.61	767.96	6667.72	7906.55	7638.24	5929.54	3812.75	2001.31	3462.05	2179.67	6650.87	5071.73	7009.59	5665.24	6381.57	6105.33	5909.93			IL-3	5826.15
IL-3 Rb	10264.5	12263.4	13637.2	9566.68	15197.4	13253.7	16399.5	6373.18	11024.2	17112.7	13925.4	14666.1	11786.5	13635.4	14229.9	13107.8	17442	17603.3	16432.8	2987.6	12158.3	7830.15	19885.7	10598.2	12268.2	12638.8	11569.8	9053.09	16055.5	11824	14311.7	15594.6	13152.5	13231.6	17771.2	10212.7	18661.7	12236.2	12583.4	11935.4	16343.1	13110.8	13898.3	14795.7	14168.1			IL-3 Rb	12055
IL-4	16321	20441.9	15034.5	8527.24	23678.2	19935	18214.9	6204.8	9243.39	25755.4	22756.1	22847.2	6873.17	17381.7	26555	17974.2	16116.4	24906.6	18911.3	1283.63	13813	4566.03	10470.6	8325.07	16217.4	15466.8	17210.8	34.04	13496.4	11748.5	20689.6	21748.8	16414.9	17028.4	12251	8679.71	10129.6	9045.25	15027.5	13192.5	17480.9	16941.2	16068	14755	15234.7			IL-4	17265.8
IL-5	1761.38	2472.17	3117.51	2604.77	1802.21	2487.09	3056.62	3720.03	1558.48	3926.04	2118.64	1504.73	2417.66	1861.54	2209.41	1592.49	3477.45	2385.8	3210.48	1.06	2039.94	313.43	2778.64	3085.43	2243.35	2632.04	4031.59	3211.81	4720.24	1148.96	2555.56	3614.92	857.87	2456.15	4262.58	3303.64	1169.48	2791.77	2923.94	1544.71	3107.9	2117.69	3623.16	3151.85	1819.9			IL-5	2450.35
IL-6	15934	16158.2	57590.5	3825.27	51051.1	39386.8	17886.6	3264.3	3835.45	29466.3	36830.9	56829.7	2470.41	14107.2	4885.43	52757.7	33395.7	329014	112320	7279.43	2658.12	4784.38	2158.29	2803.24	1679.55	1330.73	3136.1	1827.12	3943.91	1884.6	1019.9	3199.83	1276.4	2363.18	2829.06	4788.83	3127.89	2583.05	7510.76	4764.29	5309.31	2692.41	7288.56	4558.98	3977.33			IL-6	29894.2
IL-9	3801.87	4740.48	4671.09	4437.73	5621.8	5493.23	6142.39	3313.25	5238.19	9562.83	7934.97	7285.87	1598.79	5308.44	4514.3	5918.82	6301.55	7785.97	8855.04	3211.59	5471.6	2287.7	5007.38	4528.43	6630.46	6156.89	6848.41	1415.17	5815.43	1870.52	6896.53	7523.29	6058.06	6794.51	3750.23	6777.1	5053.89	4497.45	7145.2	4591.99	5140.71	7639.74	6558.91	6814.66	4393.95			IL-9	4404.48
KC	8735.22	9811.96	38968.2	4081.21	9505.02	7332.83	4920.37	2946.19	4700.06	5963.43	8314.4	10066.8	4731.34	16458.6	3401.06	51538.2	31812.7	243611	184275	135.51	9124.51	1963.96	3630.6	3494.72	3803.49	3989.18	4948	6587.54	4989.35	2102.24	5483.96	5638.44	4875.71	4354.85	4050.45	3021.13	6002.14	2983.41	5730.03	8878.88	12137.6	6266.57	17218.2	12404.6	8269.41			KC	19171.8
Leptin	13152.7	13091.2	13241.1	5262.83	13494.9	13039.4	15922.9	8226.86	7421.59	15828	13050.5	10062.3	6150.65	14549.4	14164.8	11641.1	14153.3	15942.9	14081.4	3211.05	13124.7	5059.57	10428.6	11112.9	14581.8	14230.4	13984.1	11873.9	12804.8	7744.08	13530.1	20187.2	15413.9	15800.5	9592.16	7692.09	9327.12	8130.02	14898.6	14549.5	16696.5	17196.4	16920	17345.1	15757.2			Leptin	13161.7
Leptin R	8382.68	7645.96	8333.62	2330.89	8872.43	8996.28	7948.2	175.85	3733.33	8505.43	8607.05	5151.2	2892.31	8233.68	7464.75	6482.95	9090.78	8892.41	9324.73	4106.7	8198.52	5505.59	5653.61	5505.25	10849.2	8803.96	9945.14	2989.81	7769.72	2949.93	7146.62	14096.5	10066.6	12903.2	4394.91	5335.01	5053.01	3943.97	9955.78	8902	12865.6	12118.4	12558.3	11758.4	9991.19			Leptin R	8120.75
LIX	42666.8	38527.5	53589.6	15686.7	41337.2	35829.3	34089.5	15708.6	23618.9	36954.7	39338.5	58719.7	17787.9	45291.9	30144.5	46596.1	38167.2	186096	84012.7	4607.2	36630.1	9871.86	17113.4	15184.6	41848.7	35784.6	39556.8	15312.4	17591.3	18322.3	34800.5	61580.4	53884.2	46443.6	15509	18764.5	24079.3	13649	36543.4	37879.4	58246.1	45974.4	51843.9	46541.8	43126.5			LIX	44928
L-Selectin	4545.19	5093.46	4697.93	4832.76	6487.81	6824.94	7699.69	2881.65	6272.49	9918.01	8625.38	6509.5	7279.06	6613.49	5911.38	4794.17	7557.11	8029.68	9686.65	1693.21	7741.21	5092.62	8203.23	7419.31	5044.04	5778.53	4879.25	3489.56	7763.32	4031.32	6741.73	8580.14	6831.65	6753.27	7704.64	5562.59	5408.91	5427.29	7870.91	7867.8	10243.7	11117.1	9295.78	11404.6	8996.3			L-Selectin	4778.86
Lymphotactin	38314.8	36383.9	34106.7	23726.4	34323	36627.2	34617.5	8093.84	27446.1	42430	36124.5	32384.2	28995.7	33158.7	36685	31500.3	38476.5	36323.8	38037.9	6587.92	42269.9	10536.3	15472.4	26054.6	39247.8	43850.5	42063.5	4182.99	23524.3	14115.7	37887.7	51456.2	41460.9	42149.2	18072.2	24410	37746.9	15445.8	42557.4	31272.3	43120.3	51659	46112.1	40868.2	36446.5			Lymphotactin	36268.5
MCP1	67541.4	49844.9	94632.6	32048.9	113704	70476.6	69099.8	326845	49733.8	76928.3	75907	76949.5	68409.3	78073.4	56748.8	151333	102883	134891	147626	6269.14	66847.4	8539.1	39080.8	50024.5	60146.3	61429.7	49312.3	429072	61514.4	51867	50940.8	114253	82356.3	78399.1	77067	55630.1	73587.1	53485	99207.6	209251	169340	146735	153331	169760	164463			MCP1	70673
MCP-5	5021.61	5188.97	6240.32	6323.04	5698.51	5280.27	7066.53	3190.49	6697.85	6248.44	3645.85	4508.24	5958.6	4473.47	5334.18	3923.48	4929.07	7744.15	4911.7	499.12	23644	702.69	6529.58	3782.54	10369.3	12082.3	12275.5	5571.31	9761.6	3966.03	5729.34	16596.4	9469.58	12709	7563.59	7844.55	8173.37	5170.01	13523.4	15189.3	11776.7	13747.3	21117.9	14924.7	13414.8			MCP-5	5483.63
MCSF	22436.4	19731.3	16535.5	11475.8	19748.9	21307.1	23323.4	3403.18	13823.3	28162.9	24129.5	21181.2	13016.8	18909	19687.2	19526.1	28391.5	29796.4	27083.6	4688.9	24616.8	4569.3	12938.2	12730.8	23500.2	23789.3	25449.7	0.86	13996.8	9767.58	20101.9	35368.7	27878.9	24050.4	10983	14767.4	16484.2	9803.08	25035.9	25379.7	25735.7	33830.9	28934	26117.4	28008.8			MCSF	19567.7
MIG	2177.72	2370.62	4341.64	3129.12	4108.21	3586.44	3867.33	1858.26	3880.02	4355.29	3898.81	2189.73	2484.08	2199.39	1708.38	4652.2	3484.36	3818.64	4499.06	1842.49	4484.21	3041.18	3373.98	2376.03	4688.12	2849.83	3887.05	30.67	4574.8	2847.08	2447.34	7364.96	4935.66	2673.47	4369.27	2636.99	3505.77	2489.19	3654.41	3807.16	4892.32	2958.89	4800.05	4557.91	3765.56			MIG	2963.33
MIP-1a	6522.69	5979.69	7008.2	4974.84	9794.64	8168.54	8470.08	0.73	7574.08	10717.4	8698.64	8061.68	6545.01	6448.19	5973.48	5402.28	7809.16	10149.5	10286.5	945.59	7451.46	2066.23	6163.03	4929.42	7047.96	7853.66	7919.04	8044.35	7363.92	3804.83	8598.79	10775.1	7085.62	6474.52	4123.52	5545.98	6084.33	6236.18	8222.42	7085.99	7998.77	9768.18	7996.6	8372.08	6720.92			MIP-1a	6503.53
MIP-1g	5133.39	5070.31	7453.46	228.64	14576.9	12505.1	8117.47	6028.83	2536.75	23517.2	20168.6	19281.2	4887.27	5709.98	8842.04	18517	18063.4	10338.7	8181.05	3261.75	131856	3390.43	4070.85	3463.79	99664.1	74802.2	126169	18552.6	7394.43	6632.03	9201.89	89236.2	71829.8	83115.8	7712.31	5944.75	15066.7	7362.25	28705.2	29038.6	10043.7	11022.7	50537.2	34924	19775.6			MIP-1g	5885.72
MIP-2	15990.5	16923.7	18897.7	11780.3	23857.7	17906.7	18508.2	8432.35	13054.7	27652.5	22599	21101.5	13212.8	17327.6	15508.3	20675.4	22898.8	37922.8	24444.1	9505	30872.8	10292	19222.3	15058	26319.3	26657.8	28997.3	18500.4	17065	13821.2	18064.2	33441.5	27673.5	25265.2	15343.9	13310.4	15711.4	15925.6	26989.8	25813.3	23871.4	37325.8	27745.6	26707.6	28243.8			MIP-2	17270.6
MIP-3a	44257.3	41544.9	41036	4957.89	43382.8	40634.7	40346.7	2902.19	6054.99	62148.4	54863.7	47546.1	3977.08	39357.1	31340.9	40256.9	50445.1	61660.5	46204.4	3139.11	17336.4	4584.99	5481.38	7845.92	13680.2	14896.7	12933.8	3936.53	9363.14	7436.99	38154.6	21904.6	16369.6	18240.6	8565.77	6721.76	7524.66	6674.37	17340.6	17258.7	23680.4	18575.5	19173.9	21817.6	16848.5			MIP-3a	42279.4
MIP-3b	4400.51	3804.28	6038.43	5400.33	5611.43	4597.41	4017.47	1369.39	5535.17	6147.17	5809.59	4803.54	5032.31	5102.92	3211.83	5870.56	6084.11	6691.43	5563.51	3298.22	5935.6	5374.38	6068.01	5657.05	2924.15	4949.1	4622.9	1431.13	7744.54	5181.31	5609.03	9037.8	5677.56	5415.05	7226.21	6040.02	5983.77	6082.95	5749.55	5282.59	5472.66	5473.73	4225.68	6390.23	3328.61			MIP-3b	4747.74
PF-4	22021.6	23195.5	23242.4	13319.6	26492	21277.7	22689.2	3489	14696.4	30470.4	28996.1	24220.2	11401.4	25274.9	19276.5	21381.6	29278.9	31047.6	27749.5	7685.98	34417	9686.83	20408.5	13464.7	32653.3	28617.1	28394.7	5924.27	16981.2	13322.8	26475.6	39660.4	32281.8	30077.2	15402.9	16124.4	22224.7	14737.8	33680.2	29950.9	34600.4	35050.5	32398.8	34895.4	29116			PF-4	22819.8
P-Selectin	40811.7	38721.2	34312.2	23185.6	49414.7	38457.9	39267.6	12716.3	22700.8	52138.7	44037.9	43460.9	22682.8	32747.2	34507.4	36893.1	49550.6	54877.8	49521.5	8404.08	44357.6	7460.01	25011.2	23924.3	37816.9	37347.7	38949	14687	29259.5	20490.1	36726	64492.2	38511	37996.9	25595	23909.1	30306.3	24002.5	38084.7	34863.9	42788.1	55491.3	48153.3	43423.9	35103.1			P-Selectin	37948.4
RANTES	32113.9	24096.6	23036.3	9012.29	30676	21823.7	24287.1	3042.5	10663.2	42860.9	28134.5	26054	10787.5	21378.1	20126.7	24305.2	38271.4	37007.9	40564	3225.5	32309.1	4439.71	12764	9718.02	27131.4	34725.9	33827.8	40418.8	14081.7	7193.02	25642.8	41951.8	36433.9	36725	13254.4	9291.36	14948.5	7220.19	40318.4	41055.1	57335.3	47760.9	52858.6	42901.1	41499.5			RANTES	26415.6
SCF	12491.8	14644.1	13559.7	6416.48	15045.2	14137	13296.9	21439.8	6033.68	15881.7	16632.2	9014.82	8292.38	11832.2	11702.5	8645.69	16684.9	18585.3	14546.5	3819.52	17839.8	4374.75	6727.46	10052.8	17665.1	17637	18293.9	7793.52	8737.7	6107.88	15984.6	25464.6	18795.2	18868.4	7201.3	9533.04	11195.9	6783.24	19876.6	16897.6	20097.6	24705.1	17088	18658.9	17102.3			SCF	13565.2
SDF-1a	6955.86	7917.31	7353.18	4460.99	8606.92	6690.39	6927.91	6901.76	5121.17	10837.7	4168.96	9000.5	5445.52	6605.11	6136.18	5848.25	8750.77	9602.11	9865.84	3813.44	8156.49	2745.96	4058.57	3903.95	9331.3	8853.73	8995.99	0.86	7278.62	2015.54	7748.54	11533	8777.18	7455.92	6292.44	3382.6	8664.59	3448.33	9397.81	7543.94	10134.1	10143.9	7342.41	8819.32	6493.19			SDF-1a	7408.78
sTNFRI	64408.2	51897.4	68771.7	10182.1	102819	61793.2	65493.4	66355.4	10860.2	78709.2	67879.2	71809.3	16538.2	43983.6	63653.8	61942.5	40400.9	76248.9	69936.6	19244.2	83884.7	17801.1	7825.61	14158.6	56428.1	42130.6	48552.1	44852	14018.8	13470.4	39485.2	113527	78720	67315	23692.6	14674.6	23456.8	16760.7	57875	141591	95217.1	109394	208559	154897	164897			sTNFRI	61692.4
sTNFRII	25611.8	27599	25055.1	6431	34627.2	25463.9	26716.2	1397.35	6615.33	39578.8	29029.3	30681.3	6653.12	23916.4	26649.6	30279.2	32262.9	51592.2	41972.7	5166.58	28577.3	7179.67	11116.5	8371.87	25966.8	24837.9	30274.8	5340.99	10185.8	7132.92	26799.5	34836.6	27577.8	28754.8	9986.59	7657.56	6013.95	9051.16	33326.7	27759.4	26354.8	36101.5	36974.5	30802.8	29725			sTNFRII	26088.6
TARC	10214.9	10187	7830.28	4876.17	11431.2	10363.9	11200.3	7294.27	4264.19	13380.4	9198.73	9063.45	6140.04	7507.98	8026.65	8909.77	10979.5	11568.9	11878.8	2154.99	11606.5	1119.73	4576.56	6590.91	12819.3	13053.5	12917.4	4018.12	6702.97	5259.27	11687.2	14246.6	12985.1	12376.5	7189.92	7084.34	8420.94	5572	13133.8	10901.3	13550.3	15252.1	11858.9	13611.4	11171.7			TARC	9410.73
TCA-3	27856.4	23513.5	22032.3	12364.3	28523	23207.5	27499.7	2539.58	11875	29687.3	25291.4	23915.1	11043.1	25607.9	21246.3	20852.9	23537.7	27017.8	26903.7	3640.44	31947.7	7233.06	10043.9	14495.5	27933.3	30297.5	35313.7	4075.19	14196.4	13981.4	26170.7	38853.1	32079.7	29613.9	12587.3	14786	15478.8	13474.8	33388.5	30135.8	34502.2	42871.2	25612.8	34851.6	31665.6			TCA-3	24467.4
TECK	4324.85	2621.74	4284.08	1871.43	5300.98	4726.8	5301.57	13.41	2595.68	5353.03	4764.31	3250.38	1761.84	3606.23	3351.56	4192.68	5008.18	6993.13	3718.09	114.46	4876.58	2076.87	2403.87	3177.3	4753.1	4504.06	5474.01	0.86	6329.8	2985.51	4359.69	6489.8	6276.72	4952.21	1935.45	2616.32	2643.46	3209.74	5004.32	4934.45	5166.66	6764.43	4644.55	5032.54	5138.17			TECK	3743.56
TIMP-1	10427.7	8950.75	9247.81	23705.3	17638.6	11469	14962.4	67372.8	34220.4	17219.7	15401	14003.2	26690.2	8922.53	10641.5	17816.1	18044.2	20369.6	19413.4	22868.7	53720.1	20182.5	38818.7	30376.8	41477.2	38746.1	42391.9	52884.8	47335.4	41395.7	9532.43	55067.8	43000.5	42485.9	52079.7	30552.4	36073.3	47654.1	55198.7	50400.8	52960	93723.5	54260.9	52834.3	53924.8			TIMP-1	9542.09
TNF-alpha	12277.5	21572.9	10277	1859.37	14097.5	12137.5	15573.5	0.73	3889.4	13723.4	12973	16761.2	3282.46	16349.6	8835.05	10297.7	14924.6	15991.6	18572.1	3159.31	13576.2	911.76	6483.83	5029.2	17085.1	17448.2	16355.7	0.86	8686.42	5878.36	15492.8	19948.9	19655.7	16680.1	7608.58	3404.23	3191.01	6321.2	17566.6	12730.5	16373.8	18533.5	24773.3	18571.5	15431.9			TNF-alpha	14709.1
TPO	13822.6	49560.6	13556.4	5689.4	60235.1	12159.3	13771.7	462.13	7599.74	22965.3	15121.6	11522	6407.65	10053.3	13713.3	13294.5	14791.9	15388.2	15061.9	5568.22	12809.7	6915.16	6993	7948.84	14691.7	13011.8	14558.9	1335.82	9633.45	6283.74	16332.1	16748.5	15608.8	13217.8	8511.62	8223.35	10278.8	8124.3	13497.8	10668.3	14435.7	18432.4	13817.7	14976.6	12111.5			TPO	25646.5
VCAM-1	102905	126502	144823	20651.9	114198	84963.1	50337.5	27468.6	35058.1	116925	124962	109040	23279.5	66358	115556	304180	281556	277457	193225	9747.44	75153.8	13758.8	9227.65	14829.2	61996.4	52687	61837.6	23476.5	22901.3	30852.2	76332.4	148335	114586	88298	22942.5	22933.1	28474	18539.3	56051.9	152565	174428	94181.5	255295	280814	246265			VCAM-1	124743
VEGF	29374.4	26446.1	32284.4	7668.04	44356	34486.4	31201.3	48827.2	7906.7	48593	45560.4	37374.7	11342	21237.5	29555.3	52433.9	63002.6	72108	53946.6	5118.41	20340.7	6564.44	7306.69	8636.04	18618.6	18159.8	18963.1	21976	8062.5	3681.58	18984.5	41356.4	27085.7	23958.4	8024.09	8514.72	10035.4	6548.97	24189.5	20563.8	21483.4	21538.6	35581.8	36398.3	31326.9			VEGF	29368.3
[truncated: 141 more columns]

## Sheet: mouse data_ttest_log2fold
Log2 fold vs mean within each strain	MBF IM 20	MBF IM 20	MBF IM 20	MBF P 20	MBF P 20	MBF P 20	MBF P 20	MBF P 3	MBF P 3	MBF P 3	MBF P 3	MBF P 3	MBF S 20_oxi	MBF S 20_oxi	MBF S 20_oxi	MBF S 3_xra	MBF S 3_xra	MBF S 3_xra	MBF S 3_xra	MEF IM 20	MEF IM 20	MEF IM 3	MEF P 20	MEF P 20	MEF P 20	MEF P 20	MEF P 20	MEF P 3	MEF P 3	MEF P 3	MEF P 3	MEF P 3	MEF P 3	MEF P 3	MEF S 20_oxi	MEF S 20_oxi	MEF S 20_oxi	MEF S 20_oxi	MEF S 20_oxi	MEF S 20_xra	MEF S 3_xra	MEF S 3_xra	MEF S 3_xra	MEF S 3_xra	MEF S 3_xra		Student t-test	TTEST PRE 3% vs SEN(XRA) 3%	TTEST PRE 3&20% vs SEN(XRA) 3&20%
Ax1	-1.43768	0.35639	-0.276092	-0.756151	0.0848224	0.339797	-0.666913	0.0159902	0.812401	-0.331485	0.142795	-0.752494	-0.278498	-0.155116	-0.0525435	0.470978	-0.503335	0.272622	0.349129	-0.269324	-0.231563	0.402521	-0.902479	0.481841	0.780868	0.463432	0.0892911	-1.05543	0.772026	-0.239114	0.0356271	-0.816762	-0.793907	-0.52964	0.130077	0.349341	-0.858622	0.279645	-0.413268	0.577992	0.172777	0.644619	0.599834	0.158525	0.240988		Ax1	0.86081	0.371146
BLC	-0.364369	-0.240913	-0.438586	-2.11848	0.235389	-0.0351056	-0.29685	0.345096	-0.496664	-0.109879	-0.382342	0.183403	-0.118226	-0.0445678	0.117688	-0.99896	0.0514049	0.250701	0.158422	0.167156	-3.10027	0.284326	0.44863	-0.18627	0.412522	0.085123	0.187989	0.19888	0.0491151	-0.369966	0.0795312	-0.878264	-0.0120118	-0.522268	0.422045	-0.194446	0.00175041	0.427007	0.227852	0.321749	0.0460855	0.570348	-0.134165	0.273692	0.298701		BLC	0.238552	0.194625
CD30L	-0.633861	-0.205807	0.186205	-3.23755	0.0948488	-0.744924	-0.517533	0.207188	-0.079871	0.385202	-0.53925	-0.217282	0.438898	0.139297	0.163213	-1.62148	-0.957819	0.143565	0.0829452	-0.00914644	-4.6763	0.323635	-0.514395	0.269242	0.633143	-0.0569578	0.464048	-1.14876	0.563872	0.0347801	-0.194546	-2.23673	-1.16019	-0.123141	0.677187	0.436409	-0.0699896	0.593388	0.327646	0.346147	0.468401	0.515335	0.493189	0.605672	0.324981		CD30L	0.0867233	0.0700744
CD30T	-0.574998	-0.0437684	0.13001	0.234772	-0.229764	0.984781	-1.3211	-0.137282	-0.250244	0.292246	-0.544398	-0.480484	0.238159	-0.227172	0.0983889	-0.623781	-0.904028	1.31262	-0.0776342	0.785224	0.322195	0.443586	-0.873196	0.318034	0.298906	0.197802	0.0482324	-0.492727	0.0999738	0.149066	-0.507825	-0.34971	0.392004	-0.537639	0.330444	0.0407606	0.000773831	0.133002	0.201952	0.333205	0.273701	0.243993	0.150224	0.528963	-0.0890956		CD30T	0.683676	0.246099
CD40	-2.33109	-0.265992	0.218913	-0.182707	-0.440873	-0.363992	-1.31105	-0.739766	-0.148491	0.0347945	-0.207252	-0.642404	-0.63066	-0.00287343	0.0767551	0.369264	0.0249671	-0.549697	-0.161241	0.0283304	-0.413117	0.86406	-2.26997	-0.0824041	-0.367716	0.133732	0.166398	0.174647	0.354464	-0.480187	0.224218	-1.41556	0.409423	-0.684934	0.190804	0.01234	0.210474	0.147587	-0.812841	0.922871	0.736404	0.187902	0.100193	0.825364	0.506896		CD40	0.105374	0.0219417
CRG-2	-1.1769	-0.122493	0.115888	-1.56348	-0.013474	-0.143501	-0.325794	0.234613	-0.426326	0.391526	-0.169557	-0.461282	-0.0951665	0.0692819	-0.0840348	-0.360049	-0.525453	0.0548127	-0.112364	0.655023	-0.558028	0.54817	-0.560139	0.822356	0.841124	-0.309987	-0.120389	-0.619404	0.23847	-0.063066	0.292912	-0.605821	-0.211444	-0.822991	0.0447361	0.279586	-0.0301811	0.488813	0.529031	0.409085	0.480336	0.0988329	0.209947	0.0386799	0.0932855		CRG-2	0.255755	0.0685995
CTACK	0.0134839	0.174644	-0.0848375	-2.42784	0.368925	-1.73056	-0.755891	0.338651	0.208163	0.4546	-0.856575	-0.802159	0.676312	0.861875	0.450605	-1.73407	-0.86154	0.223023	-0.00910112	0.563811	-2.01005	-0.571224	-1.25178	0.184465	0.424391	0.476492	0.418366	-0.572176	0.266353	0.0513885	-0.629974	-1.24168	-0.197553	-1.22231	0.525892	0.305166	0.180149	0.51326	0.449094	0.475983	0.503469	0.556705	0.771542	0.708834	0.436312		CTACK	0.0126979	0.0196806
CXCL16	-0.307629	-0.364601	-0.0179152	-3.06233	0.931726	-2.24889	-1.87871	-0.308353	-0.805428	-0.78149	-1.31244	-1.42439	0.494935	0.0307242	0.699845	-0.539661	-1.65273	-0.723892	-0.525825	-0.125135	0.914398	-1.14876	-1.52175	-0.837524	-0.136637	0.0204579	0.193375	-1.51061	-0.738342	-0.650885	-0.86095	-1.01095	-0.669951	-0.933269	0.163194	0.384317	0.823868	0.881784	2.14662	1.34622	0.149366	0.306428	1.28496	0.663839	0.683315		CXCL16	0.000146065	2.40082e-05
Eotaxin	-0.206897	-0.0456307	-0.0314861	-1.27403	0.443027	-0.68954	-1.82674	-0.137471	-0.0911942	0.204112	-0.655507	-1.20601	0.29399	0.288192	0.504846	-1.29977	-1.97721	0.399638	0.099101	0.789688	-0.413203	-0.0644808	-0.872382	0.438149	0.325463	0.337203	0.561614	-1.65275	0.28155	0.062186	-0.537016	-1.93817	-0.980024	-1.07793	0.519446	0.32616	0.669166	0.465808	1.3617	0.454397	0.796806	0.800928	0.68538	0.69569	0.634469		Eotaxin	0.00794283	0.00199676
Eotaxin-2	0.209019	0.349179	0.739739	-0.913804	0.386129	-0.856198	-0.40425	0.0356259	0.0276139	0.50032	-1.58688	0.159306	0.391964	0.353049	0.110854	-0.560084	-2.08002	0.455647	0.277519	0.00267078	-1.33432	-0.272737	0.547641	-0.0907421	0.834151	0.150171	0.52398	-2.80807	0.320288	0.030185	0.139559	-0.450948	-1.20249	-1.23709	0.34254	0.165774	0.438886	0.332956	0.384802	0.587253	0.662189	0.572029	0.548424	0.866899	0.375129		Eotaxin-2	0.0338853	0.0217497
Fas Ligand	-1.16515	-0.94608	-1.00318	-0.226378	-0.98635	0.503478	-0.0887654	-0.560124	-0.316776	0.209632	-0.355002	0.510475	-1.68231	-0.678651	-1.1058	0.343206	0.779707	0.327678	0.13413	-0.866489	-0.071109	1.18161	-0.309764	-1.00652	0.180827	-0.509619	-0.956524	0.189887	-0.957072	0.231632	0.857274	0.410501	0.575869	0.113771	-0.12689	-0.507665	-1.07856	-0.574497	0.0300429	-0.258292	0.271863	-0.961039	0.26778	0.201093	-2.58898		Fas Ligand	0.211589	0.32634
Fractalkine	-0.486112	-0.400912	-0.254762	-2.23218	-0.313202	0.067033	-0.324672	-0.396481	-0.231557	-0.129526	0.131025	0.541218	-0.320795	-0.137485	-0.276158	-0.649932	0.607341	0.2989	-0.164509	-0.253602	-0.716187	0.550543	0.317979	-0.739586	0.66953	-1.04852	0.0153112	0.41912	-0.106985	-0.013911	0.471103	-0.0324035	0.369999	-0.149756	-0.279027	-0.491827	0.0112393	0.3152	-0.144261	-0.158785	-0.442608	-0.145381	-0.297756	0.157019	-0.500678		Fractalkine	0.848621	0.706247
GCSF	0.157478	0.0660354	0.171445	-1.90444	0.29118	-0.586428	-0.836353	0.386759	-0.44869	-0.239051	-0.539291	-0.275235	0.396053	0.220188	0.145465	-0.189583	-0.869693	0.598209	0.360943	0.0659671	-0.175521	-0.22708	-0.483341	-0.162884	0.82524	0.0200835	0.488346	-0.0839599	-0.329815	-0.251759	-0.212163	-0.615708	-0.494452	-0.575547	0.360801	0.224245	-0.00313958	0.070131	1.31544	0.630188	0.309347	0.501587	0.376592	0.444429	0.228129		GCSF	0.0502195	0.0106902
GM-CSF	-0.381091	-0.1147	0.018691	-2.58059	0.573292	-0.561306	-0.0466164	0.0981946	-0.0126011	-0.161235	-0.553338	0.127875	0.323111	0.129518	0.268358	-12.8292	0.389456	0.500864	0.40941	-0.318468	-0.613187	0.243281	-0.621599	-0.355905	0.687872	0.0678478	0.375948	0.172449	-0.0687366	0.0128807	-0.203105	0.0376517	-0.473596	-0.605353	0.127166	0.188208	-0.0419845	0.0888814	0.221109	0.339032	0.404837	0.612114	0.32042	0.565504	-0.48199		GM-CSF	0.341719	0.392122
IFN-gamma	-0.158383	0.131865	0.0131731	-0.973811	0.566615	0.815408	-1.39982	-0.0745871	0.340668	1.14312	0.0159228	-0.0117371	-0.07208	-0.74568	-0.36005	0.0664092	-0.182504	0.586513	-0.17168	0.02622	-0.51354	0.767313	-1.10673	-0.0517547	1.02944	-0.035855	0.531653	-0.685197	-0.0580799	-0.681824	0.196945	-0.576207	-0.315199	-0.183373	-0.0745845	0.0612807	-0.186779	-0.29929	0.668116	0.654001	0.283859	-0.106725	0.525418	0.371396	-0.179241		IFN-gamma	0.620337	0.386359
IGFBP-3	-0.115903	-0.0499674	0.0663977	-2.38279	0.248681	-1.446	-0.254017	0.288072	-0.116789	0.0606741	-0.934851	-1.01126	-0.333028	-0.426962	-0.212429	-1.48796	0.134926	0.516766	0.266628	0.390578	-2.21619	-0.865181	-0.915973	-0.682826	0.416229	-0.330029	-0.029968	-0.128486	-0.0262915	-0.0470384	-0.811493	-0.86688	-0.708846	-1.07728	-0.241143	-0.0199086	0.0251691	0.314899	0.197603	0.266534	0.12368	0.418434	2.297	1.78324	1.83442		IGFBP-3	0.00535717	0.000741114
IGFBP-5	-0.0885804	0.000199586	-0.183628	-1.22228	0.462865	-0.95475	-1.1421	0.235655	0.0344343	-0.105917	-0.743917	-0.781386	-0.0281381	0.0501062	0.556484	1.11224	-0.991372	-0.0461218	0.273259	0.00796958	0.240621	-0.0213826	-0.640709	0.102848	0.680461	0.265233	0.834446	-1.01235	0.0435046	-0.122308	-0.459913	-0.797365	-0.850484	-1.01475	0.267106	0.229936	-0.0835633	0.439101	0.236951	0.15283	0.297447	0.567402	0.372872	0.60436	0.374547		IGFBP-5	0.396065	0.101506
IGFBP-6	0.323607	-0.024228	-0.00999945	-2.80056	-0.5539	-2.26045	-2.91822	0.520703	0.0865833	-0.72899	-3.70347	-2.65339	-0.465249	-0.832566	-0.531345	-3.6179	-1.70216	0.0482256	-0.100902	-0.456919	-2.97626	-1.91572	-1.98079	-0.117406	1.417	0.391549	0.403924	-2.60628	0.00364586	0.590312	-2.05436	-2.66629	-2.22968	-2.79486	-1.59372	0.219639	1.43031	1.70763	1.20561	0.450867	1.01505	0.736405	2.39739	2.07923	1.95425		IGFBP-6	0.000413819	4.95716e-05
IL-10	-0.319709	-0.256198	-0.613253	-1.29358	0.243944	-2.16788	-0.914779	-0.282953	-0.211073	-0.153422	-0.962151	-0.944192	0.206085	0.232673	0.41019	1.86525	-1.11332	0.0702879	-0.358067	-0.381612	1.20694	-0.109315	-1.10674	-0.468133	0.741256	0.213164	0.336325	-0.906227	-0.241175	-0.160047	-1.13181	-0.876399	-1.16631	-0.779882	0.342923	0.206872	-0.668107	-0.509464	-0.316205	-0.22128	0.291816	0.378628	0.45365	0.410404	0.246174		IL-10	0.835981	0.675125
IL-12 p40/p70	-0.0754664	0.236149	-0.422411	-1.1474	0.0936964	-0.342733	-0.7859	0.347019	-0.621395	0.239188	-0.674009	-1.13714	0.0107289	-0.309952	0.297052	-0.26626	0.181165	0.582278	0.299951	-0.162093	1.83512	0.16425	-1.58666	-0.46965	0.808601	0.11595	0.300911	-0.626521	0.32445	0.0443976	-0.0871844	-0.712187	-0.475108	-0.34311	-0.19881	-0.0713461	0.23123	0.299958	0.277793	0.466768	0.519644	0.257609	0.371411	0.0500318	-0.698129		IL-12 p40/p70	0.87287	0.395374
IL-12 p70	-0.0187731	0.0463704	-0.0692708	-3.54217	0.483068	-3.71038	-0.72615	0.2657	0.176145	0.242326	-0.471176	-0.709786	0.622039	0.434838	0.514522	-2.6557	-0.361814	0.547564	0.589238	0.410366	-14.4334	-0.189929	-0.852179	-0.418585	0.728388	0.374497	0.558755	-0.563416	0.149045	-0.0155174	-0.455621	-0.551074	-0.397428	-0.673019	0.629003	0.508501	0.153395	0.416748	0.566016	0.374753	0.477072	0.0883236	0.554745	0.589041	0.622305		IL-12 p70	0.237681	0.268087
IL-13	-0.850401	-0.706429	-0.794609	-2.34733	-0.102178	-0.786214	-0.960846	-0.490866	-0.364468	-0.503349	-0.74818	-0.629649	-0.62048	-0.637526	-0.148416	1.90639	-0.488255	0.168705	-0.297624	-0.347901	1.98026	-0.0859963	-0.875911	-0.284912	0.465467	-0.243437	-0.474771	-0.96599	-0.564346	-0.649108	-0.389035	-0.385643	-0.635878	-0.74356	0.47217	-0.277293	-0.609573	-0.202404	-0.107479	-0.308852	-0.0599622	0.119246	0.0242317	-0.24574	0.0183692		IL-13	0.398354	0.967427
IL-17	0.0403108	-0.162396	-0.325742	-4.38964	0.269961	-1.02216	-0.479842	0.181496	-0.359513	0.348718	-0.44611	-0.786643	-0.328686	0.302857	0.263756	-12.4674	0.154129	0.448052	0.670547	-0.100159	-2.4846	0.42155	-0.744574	0.227116	1.39834	0.619116	0.102614	-0.0814475	0.179664	-0.462937	0.21274	-2.20995	-1.05682	-0.248933	0.248903	0.35637	-0.32333	0.177021	0.557532	0.504867	0.761136	0.202041	0.474367	0.433086	0.462909		IL-17	0.299978	0.284805
IL-1a	0.240019	0.151097	-0.0272226	-2.22966	0.42245	-1.26654	-0.643407	0.434183	0.0506252	0.230305	-0.694109	-0.617741	0.254446	0.429772	0.387314	-2.14625	-0.402955	0.465298	0.239703	0.27343	-1.42447	-0.597095	-0.763313	-0.0252312	0.734527	0.422295	0.427454	-0.697942	0.355115	-0.0347375	-0.469442	-0.58973	-0.0715859	-0.731804	0.495864	0.440868	-0.257546	0.466363	0.626301	0.499133	0.560668	0.359096	0.664671	0.660945	0.480181		IL-1a	0.0360093	0.0190389
IL-1b	0.0254201	0.299063	-0.438534	-0.231979	-0.0394627	0.0676763	-1.43914	0.701237	0.223295	-0.0832949	-0.533411	-0.306076	0.0994824	-0.200561	0.0294047	-0.670087	-0.688186	0.100524	0.211358	-0.0128622	-1.12387	0.222433	-0.843653	0.166903	0.925439	-1.08357	-0.138431	-0.0173906	0.365694	-0.508601	-0.0199321	-0.578598	0.332318	-0.00384967	0.102106	-0.152829	-0.166629	0.425469	0.576068	0.75542	0.596182	0.0415416	0.349058	0.662287	0.393455		IL-1b	0.0104046	0.0103638
IL-2	0.154815	-0.255151	-0.00338384	-1.37534	0.402081	-0.2163	-1.13461	0.353012	-0.119895	0.060406	-1.52275	-0.97807	0.492816	0.320671	0.231638	-12.0263	-0.322179	0.737931	0.363504	0.655608	-1.11295	0.65038	-2.75921	-0.142852	1.05245	0.0840838	0.268727	-0.537119	-0.210146	-0.142738	-0.632832	-0.677294	-0.607591	-0.652006	1.27338	0.149565	0.15347	0.284395	0.757324	0.894729	0.3453	0.769592	0.457184	0.105261	0.0871895		IL-2	0.239434	0.217733
IL-3	0.150481	0.319311	0.521925	-1.32666	0.00410468	-0.469178	-1.14632	0.313507	-0.132252	0.236551	-0.847442	-1.50893	-0.104806	0.297695	0.224018	-1.87605	-1.19241	0.694668	0.380216	0.505467	-0.571081	0.22918	-2.47469	0.643404	0.889259	0.839451	0.474131	-1.92998	0.343134	0.27266	-0.162957	-1.09284	-0.302163	-0.96968	0.639754	0.248689	-0.0951045	0.384581	0.692604	0.656824	0.715541	0.408348	0.580122	0.51628	0.469352		IL-3	0.137746	0.0432509
IL-3 Rb	-0.374462	-0.117767	0.0354219	-2.17642	-0.151534	-0.786364	-0.476035	0.191699	-0.00573041	0.301526	0.558255	-0.349657	-0.138552	-0.0956165	-0.223112	-1.06204	-0.271452	0.362942	0.0655932	0.14036	-0.576994	0.249592	-0.191758	0.083719	0.207571	-0.038139	-0.0294885	-0.17499	0.0352314	0.0967999	0.396065	-0.403112	0.466604	-0.14232	-0.101954	-0.178229	-0.0217	0.39044	0.40372	0.304453	0.275206	-0.0427203	0.0414324	0.131702	0.0691703		IL-3 Rb	0.0834655	0.116822
IL-4	-0.0483219	0.276478	-0.166774	-3.33534	0.0923844	-1.50463	-0.984901	0.488508	0.240252	0.110068	-0.307298	-0.638108	0.3239	0.255532	0.409672	-1.44359	-0.868557	0.609824	0.431202	0.436966	-8.5722	0.0589323	-0.141166	0.675263	0.747294	0.341364	0.394301	-1.296	0.0425178	0.653932	-0.0807428	-0.577924	-0.355065	-0.51841	0.213963	0.0260757	0.0908762	-0.0665219	0.561477	0.164197	0.432137	0.386894	0.310548	0.187562	0.233719		IL-4	0.332503	0.360157
IL-5	-0.472211	0.0168606	0.351477	-11.3472	-0.436913	-3.13922	0.0922386	-0.43915	0.0255414	0.32302	0.00893967	0.160032	-0.299785	-0.0692578	0.54591	0.606397	-0.648778	0.684158	-0.205779	-0.699413	0.217947	0.773421	-1.26511	-0.1118	0.388524	-1.68661	-0.169041	-0.015306	-0.392421	-0.145256	0.626288	0.258617	-1.23957	0.0157408	0.0824744	-0.838103	-0.617633	0.509112	-0.0344442	0.393872	0.170501	-0.382948	0.391809	0.19076	-0.60158		IL-5	0.545626	0.991669
IL-6	-1.27697	-1.25681	0.576749	1.13416	-0.319256	0.52867	-3.33545	0.402861	0.0286308	-1.1102	-0.619774	-0.242567	-0.981588	-1.31744	-0.0806909	-3.56424	-3.33161	-0.390016	-0.0681648	0.557564	-0.860091	0.249964	-0.815404	-1.70123	-0.0516672	-1.37758	-0.488933	-3.96626	-1.45265	-2.98252	-0.22934	0.530011	-0.0844727	-0.360587	1.1793	0.522599	0.4503	-0.209419	3.091	1.54046	0.678862	-0.300764	1.13597	0.459049	0.262138		IL-6	0.00349942	0.000665478
IL-9	-0.519323	-0.200999	-0.222273	-0.749176	0.0194991	-1.23857	-0.29621	0.0449999	0.0116224	0.172768	-0.108408	-0.253453	0.296645	0.189738	0.343305	-0.717785	-0.0569639	0.811405	0.542192	0.419069	-1.93149	0.107422	-1.52902	0.353407	0.4789	0.166392	0.331906	-1.76905	-0.0377443	-0.27153	-0.525485	0.328204	-0.0950694	-0.263356	0.404511	-0.233344	0.119277	0.209674	0.514845	0.700467	-0.070496	0.50106	0.280992	0.336178	-0.296945		IL-9	0.273315	0.295209
KC	-1.66172	-1.49402	0.495662	-5.61832	0.454961	-1.76102	-2.75957	-1.53987	-1.91419	-2.4898	-0.874578	-0.92961	-0.807463	-0.738694	-0.427941	-3.22971	-2.55588	-2.21242	-1.73295	-1.45703	-0.0150466	-0.415935	-1.66286	-0.279568	-0.23949	-0.449174	-0.612163	-2.54631	-0.747794	-3.02258	-0.716704	-1.1397	-0.149309	-1.15782	-0.216244	0.415591	0.899007	0.202968	3.13987	2.73715	0.866625	-0.0871104	1.37108	0.898017	0.312998		KC	7.57974e-05	7.57973e-07
Leptin	0.191739	0.184977	0.201403	-1.96164	0.069525	-1.30567	-1.12971	0.228794	0.179258	0.467483	-0.262214	-0.170524	0.221409	0.186217	0.161028	-0.485206	-0.63382	0.458859	0.180485	-0.19466	-0.0749655	0.0339253	-0.691594	0.113413	0.690681	0.301473	0.337211	-0.904809	0.33734	0.29869	-0.382832	-0.701312	-0.423256	-0.621429	0.252417	0.21821	0.0156075	0.297519	0.469294	0.290171	0.416786	0.459347	0.43597	0.471769	0.333252		Leptin	0.0325273	0.0233351
Leptin R	0.419433	0.286719	0.410964	-0.899941	0.0974428	-0.477024	-1.4271	0.50135	0.52135	0.342649	-0.438748	-0.477113	0.501596	0.200232	0.376071	-5.15556	-0.747516	0.440405	0.45754	-0.28307	-1.35787	0.0199419	-1.37724	-0.10066	0.879344	0.393584	0.751736	-1.11576	0.393559	0.252115	-0.802087	-0.52243	-0.600778	-0.958272	0.377614	0.216209	0.0486716	0.536425	0.504596	0.573083	0.747526	0.661207	0.712649	0.617699	0.382736		Leptin R	0.0770956	0.0737216
LIX	-0.0431406	-0.190366	0.285699	-2.92986	0.0612093	-1.83043	-1.48671	-0.0888138	-0.295115	-0.366927	-1.03669	-1.20921	0.253362	0.0275185	0.172105	-1.4847	-0.896313	-0.250497	-0.160313	0.41759	-1.19712	-0.996958	-0.93822	-0.0127124	0.810651	0.618042	0.403659	-1.30536	0.0429986	-0.54436	-1.17871	-0.903815	-0.544027	-1.36303	0.0577905	0.109593	0.0839547	-0.203921	2.08172	0.934353	0.730341	0.38901	0.562354	0.406707	0.296754		LIX	0.0117597	0.00177627
L-Selectin	-0.528966	-0.364661	-0.481282	-1.97591	0.216887	-0.387264	-0.44046	-0.0155754	0.0575094	0.231493	0.30052	0.155613	-0.401093	-0.20497	-0.449013	-1.18641	-0.0642687	0.596744	0.395281	-0.0107603	-0.932627	0.221002	-0.72442	0.0174466	0.365329	0.0365618	0.019914	0.150445	0.0121048	-0.149812	0.210055	-0.259915	-0.300334	-0.29544	0.240858	0.240288	-0.452026	0.204528	0.292035	0.562691	0.620993	0.739036	0.480904	0.775872	0.43366		L-Selectin	0.0273836	0.00569361
Lymphotactin	0.307723	0.233122	0.139877	-2.24825	0.433486	-1.57078	-0.383685	0.148997	0.242737	0.161323	-1.01645	-0.264607	0.326467	0.486448	0.426424	-1.93528	-0.173577	0.454906	0.222799	0.0651117	-2.90354	-0.411993	-1.14884	0.275584	0.7172	0.405606	0.42936	-0.0943394	0.0992091	0.245012	-0.792373	-0.358673	0.270213	-1.01893	0.443265	-0.00125979	0.0251872	0.313799	0.230737	0.297259	0.462222	0.722875	0.559	0.384834	0.219635		Lymphotactin	0.082698	0.091579
MCP1	-0.909184	-1.34751	-0.422619	-4.23727	-0.822736	-3.79145	-1.98468	-0.157745	-0.847812	-0.876274	-1.59715	-1.24097	-0.975131	-0.944671	-1.26166	1.36558	-1.35073	-0.721442	-0.740723	-0.721044	1.85954	-0.942683	-1.18879	-1.21479	-0.0494471	-0.521728	-0.59277	-0.890764	-0.700125	-1.16037	-0.617494	-1.08774	-0.684154	-1.14447	-0.253157	0.823555	0.254699	-0.302023	0.0887662	0.218919	0.518244	0.311534	0.37497	0.521817	0.476084		MCP1	0.0664106	0.00138701
MCP-5	-0.0487552	-0.00145695	0.264715	-4.23338	1.33256	-3.73988	0.283713	0.13368	0.0237066	0.444097	-0.523848	-1.31148	0.143408	0.363985	0.386871	-0.703127	0.366793	0.266591	-0.51065	-0.204341	-0.752822	0.0562792	-1.24314	-0.712469	0.82196	0.012462	0.43694	0.198068	-0.215511	0.0383614	-0.311767	-0.259148	-0.199907	-0.860671	0.526548	0.694145	-0.404771	-0.0755897	0.576202	-0.0806827	0.327025	0.550238	1.16956	0.668792	0.514915		MCP-5	0.0406537	0.0249776
MCSF	0.258164	0.072809	-0.18211	-2.00736	0.384965	-2.04463	-0.709082	0.0740952	0.183657	0.314101	-0.543041	-0.566355	0.317995	0.335635	0.432971	-2.46272	-0.440575	0.586119	0.363121	0.175107	-14.42	-0.429581	-0.948605	0.092654	0.907795	0.564496	0.351383	-0.527302	0.011396	0.0695809	-0.779406	-0.352262	-0.193594	-0.943371	0.40932	0.428997	0.0577268	0.597782	0.667461	0.529742	0.449093	0.843664	0.618088	0.470333	0.571202		MCSF	0.210771	0.223714
MIG	-0.538945	-0.416499	0.456476	-0.922052	0.361145	-0.199078	-0.0160069	0.376746	0.180789	0.289574	-0.0492576	-0.555156	0.4253	-0.292833	0.154967	-0.767812	0.2943	0.461005	0.30127	-0.531011	-6.83074	0.39	-0.294226	-0.512495	1.07697	0.499534	-0.384996	-0.349052	-0.52466	-0.889135	0.323683	-0.404817	0.00602229	-0.488033	0.0659294	0.125006	0.556149	0.13913	0.271295	0.50786	0.48681	-0.238653	0.45934	0.384663	0.109155		MG	0.251441	0.278969
MIP-1a	-0.0907363	-0.216133	0.0128406	-2.82936	0.148873	-1.70165	-0.481553	0.495789	0.233875	0.286172	-0.125011	-0.447233	0.0685552	0.224715	0.236675	-13.216	0.124867	0.62568	0.324587	0.214877	0.259325	0.131823	-0.820819	0.355483	0.680979	0.0762436	-0.0538773	-0.0858079	-0.107309	-0.217632	-0.704774	-0.277208	-0.143552	-0.107988	0.290913	0.0763189	-0.362635	0.168964	0.547133	0.566477	0.251128	0.539439	0.250736	0.316936	8.22408e-06		MP-1a	0.371837	0.430298
MIP-1g	-0.983772	-1.00161	-0.445773	-3.43452	1.90265	-3.3787	-5.47253	0.521928	0.300761	-0.322654	-3.11484	-3.34781	1.49884	1.08484	1.83905	-0.751806	-2.0007	1.21196	0.990355	0.925439	-0.926616	-2.25373	-2.41071	-1.93823	1.33939	1.02635	1.23689	-1.05465	-0.830198	-0.199304	-2.193	-2.56855	-1.22687	-2.26002	-0.296925	-0.280265	0.867095	0.831314	0.0262992	-0.311398	-1.81195	-1.67776	0.519109	-0.0140183	-0.834516		MP-1g	0.962155	0.729457
MIP-2	-0.183598	-0.101768	0.0573978	-1.14818	0.551396	-1.03342	-0.624437	0.393642	-0.0203134	0.0273517	-0.132159	-0.48441	0.321181	0.339618	0.460979	-1.10681	-0.476244	0.606597	0.315446	0.216533	-0.187383	-0.303899	-0.608057	-0.221806	0.6667	0.393565	0.262212	-0.458877	-0.067741	-0.227772	-0.457275	-0.662386	-0.423128	-0.403592	0.357474	0.293175	0.187102	0.334459	1.06225	0.428673	0.180343	0.825233	0.397319	0.34231	0.422994		MP-2	0.0205518	0.00859074
MIP-3a	0.475423	0.384179	0.366398	-2.04093	0.424443	-1.49437	-2.68269	0.446631	0.35222	0.341958	-1.23675	-0.719347	0.0827281	0.205632	0.00178499	-3.45528	-2.3943	0.965225	0.785359	0.578834	-1.71436	-0.464297	-0.79657	1.5625	0.761873	0.341658	0.497792	-3.00071	0.306131	-0.0224459	-0.592706	-0.94245	-0.779663	-0.952658	0.424793	0.417963	0.338744	0.664222	0.953854	0.537538	0.874332	0.52404	0.569783	0.756131	0.383259		MP-3a	0.0980912	0.0383663
MIP-3b	-0.125311	-0.335359	0.331192	-0.6856	0.162107	0.018811	0.170066	0.225387	-0.0621606	-0.256695	0.193936	0.0927626	-0.85927	-0.100121	-0.198489	-1.80945	0.205646	0.35694	0.275454	0.00111604	-1.89013	0.545892	-0.0339705	0.0804639	0.768684	0.0979837	0.0296873	0.0682388	0.0883411	-0.579586	0.445952	0.187266	0.173767	0.197484	0.116162	-0.00604192	0.290516	0.342064	0.479333	0.213013	0.0449549	0.0452369	-0.328104	0.26858	-0.672368		MP-3b	0.53608	0.451014
PF-4	0.114651	0.189576	0.19249	-1.61084	0.551981	-1.27704	-0.610718	0.381288	0.0650736	0.157737	-0.20197	-0.801958	0.476089	0.285738	0.274482	-2.54338	-0.468806	0.58314	0.51159	0.251942	-1.98643	-0.467201	-0.817243	0.173523	0.756559	0.459581	0.35753	-0.835058	0.313437	-0.0774255	-0.607938	-0.541894	-0.078976	-0.671619	0.520761	0.351459	0.0721012	0.525593	0.610213	0.448193	0.559649	0.578295	0.4648	0.571897	0.310672		PF-4	0.0567822	0.0353648
P-Selectin	0.214998	0.139139	-0.0352632	-1.95862	0.441396	-2.13054	-0.600756	0.490955	0.129295	0.159355	-0.385211	-0.449309	0.211246	0.193234	0.253801	-1.46731	-0.631242	0.56837	0.324761	0.305733	-1.15325	-0.15888	-0.672858	0.169016	0.981339	0.237485	0.218096	-0.632386	-0.102613	-0.0270791	-0.351923	-0.450226	-0.108168	-0.444601	0.221426	0.0939486	0.0693662	0.494918	0.642238	0.49407	0.389424	0.764476	0.559849	0.410704	0.103813		P-Selectin	0.045042	0.0252447
RANTES	0.557379	0.143011	0.0780901	-3.01681	0.307533	-2.55587	-1.27585	0.491291	7.68099e-05	0.154371	-1.03233	-1.42567	0.055556	0.411605	0.373802	-2.84249	-1.03318	0.973843	0.366521	0.255686	0.630619	-0.890586	-1.85974	-0.0258537	0.684325	0.480874	0.492355	-1.01646	-0.0296853	-0.116708	-0.977936	-1.49045	-0.804407	-1.8543	0.627031	0.653154	0.155446	0.810448	0.762014	0.894381	1.13502	0.871423	1.01773	0.716607	0.668686		RANTES	0.0212092	0.00418053
SCF	-0.00172893	0.227609	0.116615	-1.849	0.374633	-1.65319	-0.962856	0.266593	0.176766	0.0883796	-1.03233	-0.452869	0.360436	0.358139	0.410896	0.777581	-1.0516	0.344655	0.411269	-0.47234	-0.820119	-0.655141	-1.17172	0.216216	0.888027	0.449898	0.455506	-0.592852	-0.079992	-0.0958935	-0.934137	-0.529458	-0.297496	-1.02042	0.530605	0.296352	-0.532657	0.415833	0.571452	0.217962	0.546557	0.844343	0.312517	0.439398	0.313724		SCF	0.152921	0.0757014
SDF-1a	0.0548047	0.241586	0.134944	-0.795136	0.301719	-1.26892	-0.58606	0.362073	-0.00133384	0.048996	-0.705258	-0.761295	0.495849	0.420056	0.443053	0.0435402	-0.386951	0.694563	-0.683737	0.426581	-12.9096	0.137436	-1.71506	0.227695	0.801467	0.407528	0.172157	-0.298354	-0.0198416	-0.126083	-0.0726095	-0.968097	0.388902	-0.940331	0.506095	0.189089	-0.195419	0.385986	0.519927	0.559018	0.614917	0.616311	0.150025	0.414438	-0.0273017		SDF-1a	0.284971	0.31322
sTNFRI	0.245404	-0.0661779	0.339975	-1.51464	0.609347	-1.62709	-2.41581	0.920195	0.185608	0.269509	-2.81279	-1.95738	0.0373528	-0.384193	-0.179527	0.288374	-2.32279	0.534692	0.321129	0.402331	-0.293889	-1.9717	-2.02927	-0.477749	1.0459	0.517669	0.291867	-1.71604	-0.304874	0.228406	-1.21462	-1.90574	-1.22905	-1.71398	0.0738793	1.3646	0.189089	-0.427453	0.488876	0.364207	0.79216	0.992401	1.92332	1.49418	1.58443		sTNFRI	0.019628	0.00307699
sTNFRII	0.154256	0.262064	0.122552	-1.86867	0.598913	-1.39397	-1.83944	0.589353	0.145901	0.215162	-0.763254	-1.17233	0.460712	0.396587	0.682161	-4.04179	-1.79867	0.782175	0.334957	0.414807	-1.82078	-0.889397	-1.40339	0.50625	0.884648	0.547551	0.607847	-1.79045	0.0554478	0.211561	-0.917892	-1.301	-1.64957	-1.05978	0.820722	0.55702	0.395775	0.487324	1.1646	0.866899	0.482109	0.936102	0.970574	0.707105	0.655721		sTNFRII	0.0274322	0.0146734
TARC	0.243387	0.239442	-0.140152	-2.13535	0.293829	-3.07988	-0.823467	0.405689	0.264279	0.37625	-1.04877	-0.522554	0.437214	0.463333	0.448212	-0.242452	-1.01694	0.632834	0.0922189	0.0708445	-1.23651	-0.498231	-0.848169	0.303826	0.589514	0.455754	0.3865	-0.490968	-0.200791	-0.104418	-0.397056	-0.418398	-0.16905	-0.764836	0.472181	0.203397	0.0461724	0.347525	0.422964	0.461101	0.517221	0.687904	0.324867	0.523712	0.238745		TARC	0.0363674	0.0382655
TCA-3	0.458393	0.213874	0.120004	-2.61415	0.519373	-1.62366	-0.713435	0.49251	0.194975	0.4398	-1.15002	-0.620734	0.325647	0.44286	0.663889	-2.99695	-0.771688	0.55023	0.319031	0.238306	-2.4514	-0.650814	-0.67283	0.231614	0.801691	0.525322	0.409936	-0.876471	0.336973	0.0675958	-0.82437	-0.592107	-0.526045	-0.726075	0.583013	0.43514	0.0406323	0.215358	0.414294	0.408189	0.63035	0.94367	0.200526	0.644886	0.506578		TCA-3	0.0649609	0.0562277
TECK	0.251385	-0.470741	0.23772	-5.09123	0.321723	-0.909736	-0.957124	0.544994	0.379599	0.545154	-0.698788	-0.296345	0.284722	0.207079	0.488451	-8.08181	-0.485153	0.55909	0.391002	-0.160657	-12.1475	0.698013	-0.386169	0.160079	0.734027	0.685864	0.343926	-1.04418	-0.0107739	-0.116433	-1.01148	-0.576608	-0.561719	-0.28169	0.359027	0.338743	0.206607	0.463021	0.944673	0.0332964	0.405085	0.793822	0.251392	0.36714	0.397108		TECK	0.188194	0.23457
TIMP-1	-1.15448	-1.37482	-1.32772	-0.979465	0.252623	-1.15973	0.0303064	-0.396167	-1.01716	-0.633562	-0.216088	-0.56987	-0.120521	-0.218788	-0.0890508	1.53726	0.559953	-0.430843	-0.591879	-0.729147	0.230014	0.07008	-0.123359	-2.24192	0.28837	-0.068486	-0.0858553	0.201407	-1.37938	-1.1252	0.207882	-0.561554	-0.321908	0.0797609	0.291795	0.160607	-0.381722	-0.363368	-0.188486	-0.25785	0.232064	1.05557	0.267074	0.228635	0.258109		TIMP-1	0.495462	0.183107
TNF-alpha	0.279332	1.09254	0.0227347	-1.84393	0.259463	-3.63682	-2.4438	0.478755	0.262787	0.622409	-0.806698	-1.17322	0.591122	0.621462	0.528177	-13.7584	-1.37906	0.439953	0.358828	0.728441	-13.6869	-0.384783	-0.948131	0.449981	0.814693	0.793331	0.556512	-1.62384	0.692571	-0.195374	-0.575917	-1.73622	-1.82953	-0.843346	0.631219	0.166673	0.0256377	0.561008	0.66063	0.876452	0.529773	0.708519	1.12717	0.711474	0.444299		TNF-alpha	0.142747	0.173268
TPO	-0.0104149	1.83175	-0.0384698	-0.97899	0.222958	-0.666444	-1.2911	2.11316	-0.195384	-0.0157373	-0.650295	-0.465462	0.420723	0.245542	0.407623	-4.913	-0.873422	0.722012	0.119167	-0.273053	-3.03848	-0.188154	-0.804583	0.573432	0.609754	0.508081	0.268204	-1.11958	-0.469775	-0.0218681	-0.366773	-0.41648	-0.0946065	-0.433963	0.298446	-0.040948	-0.0666144	0.0873635	0.144381	0.11346	0.395363	0.747966	0.332239	0.448432	0.142099		TPO	0.148797	0.243994
VCAM-1	-0.0124559	0.285391	0.480522	-2.91731	0.0294362	-2.42006	-2.32942	0.137768	-0.288861	-1.04406	-2.99637	-2.31197	-0.248225	-0.482963	-0.251926	-1.91791	-1.56595	0.171814	0.26772	0.0710885	-1.64919	-1.68498	-1.25504	0.0518857	1.01038	0.637949	0.261971	-2.15664	-0.645427	0.154823	-1.68239	-1.68298	-1.37076	-1.98982	-0.393647	1.05094	1.55116	1.43965	1.4185	0.896513	1.24415	0.355034	1.79368	1.93113	1.74173		VCAM-1	0.000116269	4.63743e-06
VEGF	-0.233529	-0.385034	-0.0972517	-1.78383	0.206774	-1.42485	-2.17116	0.36104	-0.00206133	-0.146483	-1.27031	-1.02915	0.0791491	0.0431528	0.105599	0.499596	-2.12694	0.49266	0.399692	0.113973	0.318333	-1.1283	-2.2592	0.107227	1.23052	0.619936	0.442936	-1.60641	-0.701475	-0.224672	-1.13519	-1.04956	-0.812497	-1.42826	0.456785	0.222511	0.602411	0.867323	1.06207	0.643443	0.285627	0.289329	1.01354	1.04628	0.829807		VEGF	0.0400481	0.00746281
[truncated: 15 more columns]

## Sheet: Fig1A
Log2 vs mean	ave MBF PRE 20% / mean	ave MEF PRE 20% / mean	ave MBF PRE 3% / mean	ave MEF PRE 3% / mean	ave MBF SEN (OXI) 20% / mean	ave MEF SEN (OXI) 20% / mean	ave MBF SEN (XRA) 3% / mean	ave MEF SEN (XRA) 3% / mean	AVE_MBF MEF_SEN (XRA) 3	TTEST PRE 3% vs SEN (XRA) 3%
KC	-2.52635	-0.621558	-2.54019	-0.33039	-2.18276	-0.488381	1.77999	0.881183	1.39948	7.57974e-05
IGFBP-6	-0.547583	-1.51279	-0.937302	-0.363702	-0.406932	-2.53888	1.02815	1.43313	1.2448	0.000413819
VCAM-1	-0.837455	-1.13421	-0.545421	-0.28814	-0.819196	-1.56363	1.12989	1.2553	1.19396	0.000116269
IL-6	-0.783989	-0.589474	-0.890319	-0.59283	-2.75445	0.318266	1.44972	0.511511	1.05558	0.00349942
CXCL-16	-0.970941	-0.0945197	-0.763777	-0.194196	-1.04862	-0.635992	1.27348	0.628407	0.986703	0.000146065
IGFBP-3	-0.05933	-0.835342	0.0425885	-0.765201	-0.134833	-1.00056	0.13692	1.2335	0.786984	0.00535717
sTNFRI	0.10954	-0.946812	0.0865605	-0.297145	-0.427803	-1.25617	0.158191	1.1691	0.750433	0.019628
LIX	-0.554198	-0.187332	-0.418396	0.0571705	-0.584559	-0.649067	0.928924	0.529727	0.743089	0.0117597
VEGF	-0.331944	-0.402365	0.0236119	0.129578	-0.838691	-0.725167	0.704768	0.627123	0.666468	0.0400481
RANTES	-0.163104	-0.320278	-0.116693	-0.0289895	-0.46243	-0.795015	0.544818	0.716017	0.632956	0.0212092
Eotaxin	-0.410958	-0.155717	-0.19059	-0.0179041	-0.344363	-0.708324	0.663548	0.587477	0.626014	0.00794283
sTNFRII	-0.141825	-0.0861048	-0.261069	-0.087813	-0.431213	-0.69295	0.601716	0.583424	0.592599	0.0274322
MCP-1	-0.467515	-0.974061	0.298112	0.2804	-0.541981	-0.508647	0.444062	0.653992	0.552842	0.0664106
MIP-3a	-0.130516	-0.373628	-0.0283497	0.214416	-0.507749	-0.601458	0.48814	0.494507	0.491327	0.0980912
Eotaxin-2	0.0349467	-0.130455	-0.192369	0.0202218	-0.354837	-0.500848	0.398739	0.449588	0.424388	0.0338853
Leptin R	0.0645499	-0.0612989	-0.362329	-0.0396584	-0.118851	-0.568173	0.328161	0.479482	0.405805	0.0770956
GCSF	-0.317565	-0.0517917	-0.0275204	0.0259165	-0.321289	-0.338859	0.501941	0.294512	0.401951	0.0502195
CTACK	0.029652	0.104683	-0.257265	-0.232445	-0.145197	-0.528334	0.308368	0.464873	0.388742	0.0126979
MIP-2	-0.122093	0.0241188	-0.0783303	-0.0572508	-0.352952	-0.389429	0.434041	0.331838	0.383844	0.0205518
IL-1a	-0.0175366	-0.0877555	-0.161295	-0.130773	-0.151008	-0.322013	0.283612	0.428377	0.35781	0.0360093
PF-4	-0.0599696	-0.0439224	-0.0997907	-0.114263	-0.227302	-0.317909	0.325751	0.382833	0.354574	0.0567822
IL-1b	-0.0554538	-0.225128	-0.25478	-0.149031	-0.10311	-0.0650341	0.343203	0.363678	0.353477	0.0104046
P-Selectin	0.000417983	-0.107971	-0.101798	-0.0227281	-0.325644	-0.308428	0.344712	0.356389	0.350562	0.045042
CD30L	0.0169636	-0.0506751	-0.343377	-0.0683876	-0.0429501	-0.390074	0.297849	0.398046	0.348817	0.0867233
TCA-3	0.100393	-0.0554787	-0.19479	-0.11196	-0.146335	-0.451863	0.202501	0.466023	0.340271	0.0649609
L-Selectin	-0.0853805	-0.219832	-0.00291214	-0.208792	-0.0544526	-0.190203	0.132933	0.485005	0.319682	0.0273836
TARC	0.066432	-0.0358404	-0.0655453	-0.0918866	-0.323636	-0.306881	0.260915	0.353723	0.308065	0.0363674
MCP-5	0.175128	-0.206423	-0.151395	-0.189401	-0.0380035	-0.297803	-0.00498038	0.528928	0.286533	0.0406537
Leptin	-0.0211318	-0.0554331	-0.149038	0.0567209	-0.0589159	-0.429597	0.205022	0.327832	0.267734	0.0325273
Lymphotactin	-0.0150545	-0.0210166	-0.156949	-0.140761	0.0124847	-0.291079	0.143745	0.367518	0.259966	0.082698
IL-3 Rb	-0.0307184	-0.0502159	-0.139035	-0.0582715	-0.0723594	0.0437104	0.216436	0.0607844	0.140708	0.0834655

## Sheet: Fig1C
	Mouse Fib SEN (XRA) 3 / PRE 3	TTEST PRE 3 vs XRA 3	Mouse Fib SEN (OXI) 20 / PRE 20	TTEST PRE 20 vs SEN (OXI) 20		TTEST PRE3 vs XRA3	TTEST PRE20 vs SEN(OXI) 20	apparent overlap
Ax1	0.0155137	0.86081	-0.0992254	0.520344
BLC	0.235755	0.238552	0.00384534	0.819332
CD30L	0.55383	0.0867233	-0.199656	0.225966		1
CD30T	-0.0466452	0.683676	0.13337	0.519809
CD40	0.414164	0.105374	0.324268	0.382925
CRG-2	0.17178	0.255755	-0.0910799	0.492961
CTACK	0.631475	0.0126979	-0.403933	0.193761		1
CXCL-16	1.42993	0.000146065	-0.309575	0.597231		1
Eotaxin	0.72976	0.00794283	-0.243006	0.376161		1
Eotaxin-2	0.510237	0.0338853	-0.380088	0.207424		1
Fas Ligand	-0.430618	0.211589	0.477306	0.0561747			1
Fractalkine	-0.121289	0.848621	0.233427	0.157013
GCSF	0.399028	0.0502195	-0.145396	0.458464		1
GM-CSF	0.244098	0.341719	-0.108256	0.291977
IFN-gamma	0.0726265	0.620337	-0.333948	0.545153
IGFBP-3	1.04652	0.00535717	-0.120359	0.443464		1
IGFBP-5	0.072972	0.396065	-0.264354	0.294483
IGFBP-6	1.88114	0.000413819	-0.442722	0.54052		1
IL-10	-0.383067	0.835981	-0.273564	0.233427
IL-12 p40/p70	-0.0843186	0.87287	0.00830871	0.883531
IL-12 p70	0.441146	0.237681	-0.267296	0.27227
IL-13	-0.61796	0.398354	0.060477	0.61492
IL-17	0.230543	0.299978	-0.144354	0.386625
IL-1a	0.502029	0.0360093	-0.183864	0.409607		1
IL-1b	0.555346	0.0104046	0.0562185	0.604059		1
IL-2	0.377083	0.239434	-0.0423201	0.958829
IL-3	0.334864	0.137746	-0.024546	0.788006
IL-3 Rb	0.237264	0.0834655	0.0261426	0.756814		1
IL-4	0.160688	0.332503	-0.175276	0.406822
IL-5	0.0576508	0.545626	-0.116706	0.516161
IL-6	1.72219	0.00349942	-0.531362	0.873191		1
IL-9	0.173821	0.273315	-0.305135	0.196261
KC	2.76588	7.57974e-05	0.238386	0.706721		1
Leptin	0.312586	0.0325273	-0.205974	0.29437		1
Leptin R	0.604815	0.0770956	-0.345137	0.23978		1
LIX	0.909938	0.0117597	-0.246048	0.374884		1
L-Selectin	0.414821	0.0273836	0.0302787	0.785459		1
Lymphotactin	0.404486	0.082698	-0.121262	0.51241		1
MCP-1	0.259771	0.0664106	0.195474	0.201168		1
MCP-5	0.432372	0.0406537	-0.152256	0.602662		1
MCSF	0.568323	0.210771	-0.246509	0.239741
MIG	0.292716	0.251441	-0.41495	0.0677682			1
MIP-1a	0.198156	0.371837	-0.239666	0.15807
MIP-1g	-0.374063	0.962155	-1.35037	0.575331
MIP-2	0.45073	0.0205518	-0.322203	0.0817948		1	1	1
MIP-3a	0.39829	0.0980912	-0.302531	0.519819		1
MIP-3b	0.076167	0.53608	0.109289	0.273994
PF-4	0.461319	0.0567822	-0.220659	0.290928		1
P-Selectin	0.412813	0.045042	-0.263259	0.16613		1
RANTES	0.703259	0.0212092	-0.387031	0.253024		1
SCF	0.254443	0.152921	-0.285431	0.290837
SDF-1a	0.3324	0.284971	-0.155268	0.544228
sTNFRI	0.768936	0.019628	-0.423351	0.633317		1
sTNFRII	0.767011	0.0274322	-0.448117	0.229584		1
TARC	0.386035	0.0363674	-0.330554	0.315531		1
TCA-3	0.487637	0.0649609	-0.321556	0.289687		1
TECK	0.446923	0.188194	-0.481827	0.0944952			1
TIMP-1	-0.0430149	0.495462	0.0359329	0.894026
TNF-alpha	0.630794	0.142747	-0.457179	0.310342
TPO	0.363593	0.148797	-0.712556	0.298478
VCAM-1	1.60937	0.000116269	-0.205582	0.795178		1
VEGF	0.58935	0.0400481	-0.414774	0.344904		1
	correlation 3% vs 20%					31	4	0	OVERLAP
	-0.107695

## Sheet: FigS1
	MBF PRE 20	MEF PRE 20	MBF PRE 3	MEF PRE 3	MBF SEN (OXI) 20	MEF SEN (OXI) 20	MEF SEN (XRA) 20	MBF SEN (XRA) 3	MEF SEN (XRA) 3	MBF IM 20	MEF IM 20	AVE_MBF MEF_SEN (XRA) 3
KC	-2.52635	-0.621558	-2.54019	-0.33039	-2.18276	-0.488381	0.538519	1.77999	0.881183	-0.95694	-0.400844	1.39948
IGFBP-6	-0.547583	-1.51279	-0.937302	-0.363702	-0.406932	-2.53888	-0.117545	1.02815	1.43313	-0.134434	-1.61523	1.2448
VCAM-1	-0.837455	-1.13421	-0.545421	-0.28814	-0.819196	-1.56363	0.79298	1.12989	1.2553	0.0477441	-1.05259	1.19396
IL-6	-0.783989	-0.589474	-0.890319	-0.59283	-2.75445	0.318266	0.5112	1.44972	0.511511	-0.691476	0.571829	1.05558
CXCL-16	-0.970941	-0.0945197	-0.763777	-0.194196	-1.04862	-0.635992	0.339604	1.27348	0.628407	-0.35211	-0.0251732	0.986703
IGFBP-3	-0.05933	-0.835342	0.0425885	-0.765201	-0.134833	-1.00056	-0.307313	0.13692	1.2335	-0.0994101	-0.822884	0.786984
sTNFRI	0.10954	-0.946812	0.0865605	-0.297145	-0.427803	-1.25617	1.11901	0.158191	1.1691	0.147943	-0.33827	0.750433
LIX	-0.554198	-0.187332	-0.418396	0.0571705	-0.584559	-0.649067	0.154051	0.928924	0.529727	-0.0526893	-0.723413	0.743089
VEGF	-0.331944	-0.402365	0.0236119	0.129578	-0.838691	-0.725167	0.118014	0.704768	0.627123	-0.33487	-0.573911	0.666468
RANTES	-0.163104	-0.320278	-0.116693	-0.0289895	-0.46243	-0.795015	0.476454	0.544818	0.716017	0.137324	-0.731883	0.632956
Eotaxin	-0.410958	-0.155717	-0.19059	-0.0179041	-0.344363	-0.708324	0.189489	0.663548	0.587477	-0.217923	-0.310513	0.626014
sTNFRII	-0.141825	-0.0861048	-0.261069	-0.087813	-0.431213	-0.69295	0.378702	0.601716	0.583424	0.020674	-0.339648	0.592599
MCP-1	-0.467515	-0.974061	0.298112	0.2804	-0.541981	-0.508647	1.03463	0.444062	0.653992	-0.480912	-1.48234	0.552842
MIP-3a	-0.130516	-0.373628	-0.0283497	0.214416	-0.507749	-0.601458	0.280448	0.48814	0.494507	0.256542	-0.472977	0.491327
TNF-alpha	-0.0376365	-0.0356408	-0.242841	-0.052579	-0.239875	-0.74776	-0.0070166	0.415599	0.550569	0.392504	-0.612393	0.484662
MCSF	-0.085876	-0.0650863	-0.149948	-0.135979	-0.226352	-0.417628	0.301738	0.38041	0.470308	-0.0406474	-0.490755	0.426059
Eotaxin-2	0.0349467	-0.130455	-0.192369	0.0202218	-0.354837	-0.500848	0.00140139	0.398739	0.449588	0.410116	-0.286499	0.424388
Leptin R	0.0645499	-0.0612989	-0.362329	-0.0396584	-0.118851	-0.568173	0.0657771	0.328161	0.479482	0.271213	-0.467154	0.405805
GCSF	-0.317565	-0.0517917	-0.0275204	0.0259165	-0.321289	-0.338859	0.143516	0.501941	0.294512	0.0292804	-0.50468	0.401951
CTACK	0.029652	0.104683	-0.257265	-0.232445	-0.145197	-0.528334	0.169152	0.308368	0.464873	-0.06364	-0.573116	0.388742
IL-3	-0.159587	-0.371456	-0.0656609	0.168348	-0.211237	-0.368898	0.11706	0.362234	0.410182	0.258673	-0.644616	0.386407
MIP-2	-0.122093	0.0241188	-0.0783303	-0.0572508	-0.352952	-0.389429	0.174944	0.434041	0.331838	-0.182828	-0.179608	0.383844
IL-2	-0.21163	-0.194913	-0.0053479	-0.0164525	-0.384136	-0.107048	0.0482392	0.458279	0.274086	-0.122294	-0.329969	0.36912
CD40	-0.427039	-0.299891	-0.00444779	-0.109655	0.0812856	-0.159679	-0.0378543	0.264634	0.44959	-0.428441	-0.356217	0.360074
IL-1a	-0.0175366	-0.0877555	-0.161295	-0.130773	-0.151008	-0.322013	0.319563	0.283612	0.428377	0.0375575	-0.485865	0.35781
PF-4	-0.0599696	-0.0439224	-0.0997907	-0.114263	-0.227302	-0.317909	0.233719	0.325751	0.382833	0.0637386	-0.274958	0.354574
IL-1b	-0.0554538	-0.225128	-0.25478	-0.149031	-0.10311	-0.0650341	-0.213703	0.343203	0.363678	-0.099927	-0.193386	0.353477
TECK	0.161407	-0.0632838	-0.267016	0.0794489	-0.40369	-0.46184	0.217249	0.372577	0.333702	-0.0385853	-0.7663	0.35327
P-Selectin	0.000417983	-0.107971	-0.101798	-0.0227281	-0.325644	-0.308428	-0.0115439	0.344712	0.356389	0.014435	-0.413787	0.350562
CD30L	0.0169636	-0.0506751	-0.343377	-0.0683876	-0.0429501	-0.390074	0.350102	0.297849	0.398046	-0.199852	-0.854904	0.348817
TCA-3	0.100393	-0.0554787	-0.19479	-0.11196	-0.146335	-0.451863	0.296187	0.202501	0.466023	0.195993	-0.463894	0.340271
IL-12 p70	-0.0643	0.0603585	-0.0413406	-0.200307	-0.219327	-0.319207	0.391997	0.278429	0.362217	-0.11988	-0.547446	0.320931
L-Selectin	-0.0853805	-0.219832	-0.00291214	-0.208792	-0.0544526	-0.190203	0.108843	0.132933	0.485005	-0.520538	-0.629183	0.319682
TARC	0.066432	-0.0358404	-0.0655453	-0.0918866	-0.323636	-0.306881	0.0898817	0.260915	0.353723	0.0576948	-0.573982	0.308065
IL-17	-0.076258	-0.241323	-0.0407017	0.181952	-0.13907	-0.46722	0.252962	0.227986	0.374351	-0.182682	-0.777466	0.303024
SCF	-0.0678186	-0.0690117	0.107192	-0.0225435	-0.27223	-0.435462	0.194646	0.189986	0.403548	0.0823876	-0.447184	0.300715
MCP-5	0.175128	-0.206423	-0.151395	-0.189401	-0.0380035	-0.297803	0.547379	-0.00498038	0.528928	0.0233234	0.215935	0.286533
IGFBP-5	-0.1685	-0.176638	0.215839	0.198179	-0.305121	-0.568725	0.153154	0.188375	0.371587	-0.0987536	-0.22328	0.282888
SDF-1a	-0.092668	-0.00711482	0.0185117	-0.141991	-0.230832	-0.179486	0.0949439	0.259611	0.28171	0.0585461	-0.239032	0.270703
Leptin	-0.0211318	-0.0554331	-0.149038	0.0567209	-0.0589159	-0.429597	0.121798	0.205022	0.327832	0.120615	-0.711139	0.267734
MIG	0.159509	-0.079112	-0.0229618	-0.0302124	-0.62609	-0.123413	0.0692923	0.323028	0.209229	-0.150144	-0.19797	0.26725
Lymphotactin	-0.0150545	-0.0210166	-0.156949	-0.140761	0.0124847	-0.291079	-0.113288	0.143745	0.367518	0.151077	-0.469584	0.259966
CRG-2	-0.0689586	-0.166	-0.0763272	0.183531	-0.185656	-0.231463	0.251478	0.285646	0.165119	-0.375274	-0.617724	0.226641
IL-9	-0.0913526	0.0472766	0.206389	-0.119825	-0.601932	-0.0524143	-0.298167	0.320415	0.11379	-0.391682	-0.379061	0.220799
BLC	-0.140464	-0.067725	-0.0456788	-0.00997957	-0.0568393	-0.143659	-0.226723	0.217318	0.198534	-0.38128	-0.539127	0.207956
MIP-1a	0.0857044	-0.0683112	-0.0778418	0.0670067	-0.226928	-0.235012	-0.00518487	0.185064	0.200413	-0.186138	-0.760272	0.192759
GM-CSF	-0.0626043	0.0100412	-0.077412	-0.0346648	0.00736611	-0.27644	0.107798	0.123786	0.252333	-0.184619	-0.353502	0.189491
IFN-gamma	0.187943	-0.240954	0.0176919	0.211388	-0.519785	-0.201123	0.0279592	0.202947	0.171386	-0.0757118	-0.0404052	0.187253
IL-4	-0.0205358	-0.0253435	-0.0393142	0.0688488	-0.0750494	-0.321383	-0.0626544	0.126585	0.224326	-0.0472785	-0.868146	0.176283
TIMP-1	-0.255668	-0.276665	0.551284	-0.157277	-0.391805	-0.0686626	0.117098	-0.0972153	0.405193	-1.08405	-0.279215	0.175749
IL-12 p40/p70	-0.211914	-0.323055	0.0677088	0.441779	-0.126	-0.392351	-0.116583	0.229206	0.111645	-0.154894	-0.442553	0.171623
TPO	0.634007	-0.0455524	-0.359447	-0.0623259	-0.557004	-0.279654	-0.146416	-0.0160228	0.321436	0.793405	-0.361773	0.162551
Ax1	0.0169587	-0.242614	0.0612111	0.186755	-0.0333773	-0.390728	0.296288	-0.0473618	0.326356	-0.328042	-0.328288	0.151564
CD30T	-0.316256	-0.200896	0.271117	0.107627	-0.124292	-0.126121	-0.0103068	0.101182	0.184272	-0.20409	-0.0299463	0.143325
IL-3 Rb	-0.0307184	-0.0502159	-0.139035	-0.0582715	-0.0723594	0.0437104	-0.216355	0.216436	0.0607844	-0.205148	-0.872675	0.140708
MIP-3b	-0.037326	-0.167799	-0.0893209	0.073977	-0.17858	0.192033	-0.0428242	0.265441	-0.128451	-0.0848264	-0.237142	0.0818962
IL-10	-0.218947	-0.126397	0.564596	0.248652	-0.257668	-0.634805	0.172681	-0.276843	0.323957	-0.246539	-0.363203	0.0546089
IL-5	0.00989402	0.069534	0.0543847	-0.0860403	-0.191956	0.0379719	-0.865902	0.110075	-0.0264286	-0.0119127	-1.46396	0.0434368
MIP-1g	-0.29341	0.809128	0.398368	0.215802	-0.744292	-1.44073	-0.276627	0.343752	-0.477707	-0.883014	0.941547	-0.00928454
IL-13	-0.38573	-0.473003	0.700321	0.461743	-0.539115	-0.198664	-0.2096	-0.117867	0.0440094	-0.605323	-0.758368	-0.0346594
Fractalkine	-0.250345	0.0430285	0.0514973	0.0192105	0.134876	0.124662	-0.473343	0.0355763	-0.207446	-0.360693	-0.956216	-0.0808238
Fas Ligand	-0.0737793	-0.426202	0.32256	0.0189877	0.00294486	0.451686	-0.462883	-0.326871	-0.192818	-0.948049	-0.512109	-0.258288
