# Supplementary material for: A Human-Like Senescence-Associated Secretory Phenotype Is Conserved in Mouse Cells Dependent on Physiological Oxygen
Source: PLoS One. 2010 Feb 12;5(2):e9188. doi: 10.1371/journal.pone.0009188 (PMC2820538; doi:10.1371/journal.pone.0009188)
Supplement: Dataset S2 — Gene Orthology: List of human and mouse genes corresponding to the specific proteins detected by antibody array The first spreadsheet (“human gene IDs + mouse orthologs”) lists all human genes found on the human antibody arrays and their corresponding mouse orthologs. The second spreadsheet (“mouse gene IDs + human orthologs”) lists all mouse genes found on the mouse antibody arrays and their corresponding human orthologs. (0.09 MB XLS) [file pone.0009188.s008.xls]

## Sheet: Human gene IDs + mouse ortholog
S02 SUPPLEMENTAL TABLE 2
A. HUMAN PROTEINS INTERROGATED BY ARRAYS: 120 proteins (Chemicon; Human cat #AA1001CH-8)								MOUSE HOMOLOGUE
classification for "homo sapiens", from pubmed/unigene data base
								MOUSE
Array GENE NAME	UNIGENE	Official Symbol	stands for	Other Aliases:	Other Designations:	Chromosome Location	GeneID	Gene ID	comment
Adiponectin	Hs.80485	ADIPOQ	adiponectin, C1Q and collagen domain containing	HGNC:13633, ACDC, ACRP30, APM-1, APM1, GBP28, adiponectin	adipocyte, C1Q and collagen domain containing; adipocyte, C1Q and collagen domain-containing; adiponectin; adipose most abundant gene transcript 1; gelatin-binding protein 28	3q27	9370	11450
AgRP	Hs.104633	AGRP	agouti related protein homolog (mouse)	HGNC:330, AGRT, ART, ASIP2	Agouti-related transcript, mouse, homolog of; agouti (mouse) related protein; agouti related protein homolog	16q22	181	11604
Amphiregulin	Hs.270833	AREG	amphiregulin (schwannoma-derived growth factor)	HGNC:651, AR, CRDGF, MGC13647, SDGF	amphiregulin; colorectum cell-derived growth factor; schwannoma-derived growth factor	4q13-q21	374	11839
Angiogenin	Hs.283749	ANG	angiogenin, ribonuclease, RNase A family, 5	HGNC:483, MGC71966, RNASE4, RNASE5		14q11.1-q11.2	283	11727
Angiopoietin-2	Hs.553484	ANGPT2	angiopoietin 2	HGNC:485, AGPT2, ANG2	Tie2-ligand; angiopoietin-2; angiopoietin-2B; angiopoietin-2a	8p23.1	285	11601
Axl	Hs.466791	AXL	AXL receptor tyrosine kinase	HGNC:905, UFO	AXL transforming sequence/gene; oncogene AXL	19q13.1	558	26362
BDNF	Hs.502182	BDNF	brain-derived neurotrophic factor	HGNC:1033, MGC34632	neurotrophin	11p13	627	12064
bFGF	Hs.284244	FGF2	fibroblast growth factor 2 (basic)	HGNC:3676, BFGF, FGFB, HBGH-2	basic fibroblast growth factor; basic fibroblast growth factor bFGF; fibroblast growth factor 2; heparin-binding growth factor 2 precusor; prostatropin	4q26-q27	2247	14173
BLC	Hs.100431	CXCL13	chemokine (C-X-C motif) ligand 13 (B-cell chemoattractant)	HGNC:10639, ANGIE, ANGIE2, BCA-1, BCA1, BLC, BLR1L, SCYB13	B-cell-homing chemokine (ligand for Burkitt's lymphoma receptor-1); small inducible cytokine B subfamily (Cys-X-Cys motif), member 13 (B-cell chemoattractant)	4q21	10563	55985
BMP-4	Hs.68879	BMP4	bone morphogenetic protein 4	HGNC:1071, BMP2B, BMP2B1, ZYME	bone morphogenetic protein 2B	14q22-q23	652	12159
BMP-6	Hs.285671	BMP6	bone morphogenetic protein 6	HGNC:1073, VGR, VGR1	Vg-related sequence; transforming growth factor-beta; vegetal related growth factor (TGFB-related); vegetal-related (TGFB related) cytokine	6p24-p23	654	12161
b-NGF	Hs.2561	NGFB	nerve growth factor, beta polypeptide	HGNC:7808, Beta-NGF, HSAN5, NGF	beta-nerve growth factor; nerve growth factor, beta subunit	1p13.1	4803	18049
BTC	Hs.73105	BTC	betacellulin	HGNC:1121		4q13-q21	685	12223
CCL28/VIC	Hs.334633	CCL28	chemokine (C-C motif) ligand 28	HGNC:17700, CCK1, MEC, MGC71902, SCYA28	CC chemokine CCL28; mucosae-associated epithelial chemokine; small inducible cytokine A28; small inducible cytokine subfamily A (Cys-Cys), member 28	5p12	56477	56838
CK-beta-8-1	Hs.169191	CCL23	chemokine (C-C motif) ligand 23	HGNC:10622, CK-BETA-8, CKb8, Ckb-8, Ckb-8-1, MIP-3, MIP3, MPIF-1, SCYA23	C6 beta-chemokine; hmrp-2a; macrophage inflammatory protein 3; myeloid progenitor inhibitory factor 1; small inducible cytokine A23; small inducible cytokine subfamily A (Cys-Cys), member 23	17q12	6368		none
CNTF	Hs.524920	CNTF	ciliary neurotrophic factor	HGNC:2169, HCNTF		11q12.2	1270	626519
CTACK/CCL27	Hs.459590	CCL27	chemokine (C-C motif) ligand 27	HGNC:10626, ALP, CTACK, CTAK, ESKINE, ILC, PESKY, SCYA27	CC chemokine ILC; IL-11 Ralpha-locus chemokine; OTTHUMP00000000533; cutaneous T-cell attracting chemokine; skinkine; small inducible cytokine A27; small inducible cytokine subfamily A (Cys-Cys), member 27	9p13	10850	20301
Dtk	Hs.381282	TYRO3	TYRO3 protein tyrosine kinase	HGNC:12446, BYK, Brt, Dtk, RSE, Sky, Tif	TYRO3 protein tyrosine kinase variant; Tyro3 protein tyrosine kinase (sea-related receptor tyrosine kinase); tyrosine-protein kinase receptor TYRO3 precursor	15q15.1-q21.1	7301	22174
EGF	Hs.419815	EGF	epidermal growth factor (beta-urogastrone)	HGNC:3229, URG	urogastrone	4q25	1950	13645
EGF-R	Hs.488293	EGFR	epidermal growth factor receptor (erythroblastic leukemia viral (v-erb-b) oncogene homolog, avian)	HGNC:3236, ERBB, ERBB1, mENA	avian erythroblastic leukemia viral (v-erb-b) oncogene homolog; epidermal growth factor receptor; epidermal growth factor receptor (avian erythroblastic leukemia viral (v-erb-b) oncogene homolog); truncated epidermal growth factor receptor	7p12	1956	13649
ENA-78	Hs.89714	CXCL5	chemokine (C-X-C motif) ligand 5	HGNC:10642, ENA-78, SCYB5	epithelial-derived neutrophil activating protein 78; epithelial-derived neutrophil-activating peptide 78; neutrophil-activating peptide ENA-78; neutrophil-activating protein 78; small inducible cytokine B5; small inducible cytokine subfamily B (Cys-X-Cys), member 5; small inducible cytokine subfamily B (Cys-X-Cys), member 5 (epithelial-derived neutrophil-activating peptide 78)	4q12-q13	6374	20311	weak similarity
Eotaxin	Hs.54460	CCL11	chemokine (C-C motif) ligand 11	HGNC:10610, MGC22554, SCYA11	eosinophil chemotactic protein; eotaxin; small inducible cytokine A11; small inducible cytokine subfamily A (Cys-Cys), member 11; small inducible cytokine subfamily A (Cys-Cys), member 11 (eotaxin)	17q21.1-q21.2	6356	20292
Eotaxin-2	Hs.247838	CCL24	chemokine (C-C motif) ligand 24	HGNC:10623, Ckb-6, MPIF-2, MPIF2, SCYA24	CK-beta-6; eotaxin-2; myeloid progenitor inhibitory factor 2; small inducible cytokine A24; small inducible cytokine subfamily A (Cys-Cys), member 24	7q11.23	6369	56221
Eotaxin-3	Hs.131342	CCL26	chemokine (C-C motif) ligand 26	HGNC:10625, IMAC, MGC126714, MIP-4a, MIP-4alpha, SCYA26, TSC-1	CC chemokine IMAC; chemokine (C-C motif) ligand 26,; chemokine N1; eotaxin-3; macrophage inflammatory protein 4-alpha; small inducible cytokine A26; small inducible cytokine subfamily A (Cys-Cys), member 26; thymic stroma chemokine-1	7q11.23	10344		none
Fas/TNFRSF6	Hs.244139	FAS	Fas (TNF receptor superfamily, member 6)	HGNC:11920, ALPS1A, APO-1, APT1, Apo-1 Fas, CD95, FAS1, FASTM, TNFRSF6	APO-1 cell surface antigen; CD95 antigen; Fas antigen; OTTHUMP00000059646; apoptosis antigen 1; tumor necrosis factor receptor superfamily, member 6	10q24.1	355	14102
FGF-4	Hs.1755	FGF4	fibroblast growth factor 4 (heparin secretory transforming protein 1, Kaposi sarcoma oncogene)	HGNC:3682, HBGF-4, HST, HST-1, HSTF1, K-FGF, KFGF	fibroblast growth factor 4; heparin secretory transforming protein 1; human stomach cancer, transforming factor from FGF-related oncogene; kaposi sarcoma oncogene; oncogene HST; transforming protein KS3	11q13.3	2249	14175
FGF-6	Hs.166015	FGF6	fibroblast growth factor 6	HGNC:3684, HBGF-6, HST2		12p13	2251	14177
FGF-7	Hs.567268	FGF7	fibroblast growth factor 7 (keratinocyte growth factor)	HGNC:3685, HBGF-7, KGF	fibroblast growth factor 7; keratinocyte growth factor	15q15-q21.1	2252	14178
FGF-9	Hs.111	FGF9	fibroblast growth factor 9 (glia-activating factor)	HGNC:3687, GAF, HBFG-9, MGC119914, MGC119915	fibroblast growth factor 9; glia-activating factor	13q11-q12	2254	14180
Flt-3 ligand	Hs.428	FLT3LG	fms-related tyrosine kinase 3 ligand	HGNC:3766		19q13.3	2323	14256
Fractalkine / FKN	Hs.531668	CX3CL1	chemokine (C-X3-C motif) ligand 1	HGNC:10647, ABCD-3, C3Xkine, CXC3, CXC3C, NTN, NTT, SCYD1, fractalkine, neurotactin	small inducible cytokine subfamily D (Cys-X3-Cys), member 1; small inducible cytokine subfamily D (Cys-X3-Cys), member 1 (fractalkine, neurotactin); small inducible cytokine subfamily D (Cys-X3-Cys), member-1	16q13	6376	20312
GCP-2	Hs.164021	CXCL6	chemokine (C-X-C motif) ligand 6 (granulocyte chemotactic protein 2)	HGNC:10643, CKA-3, GCP-2, GCP2, SCYB6	Small inducible cytokine subfamily B (Cys-X-Cys), member b; small inducible cytokine subfamily B (Cys-X-Cys), member 6 (granulocyte chemotactic protein 2)	4q21	6372		none
GCSF	Hs.2233	CSF3	colony stimulating factor 3 (granulocyte)	HGNC:2438, G-CSF, GCSF, MGC45931	colony stimulating factor 3; filgrastim; granulocyte colony stimulating factor; lenograstim; pluripoietin	17q11.2-q12	1440	12985
GDNF	Hs.248114	GDNF	glial cell derived neurotrophic factor	HGNC:4232, ATF1, ATF2, HFB1-GDNF	astrocyte-derived trophic factor; glial cell line derived neurotrophic factor; glial derived neurotrophic fac	5p13.1-p12	2668	14573
GITR/TNFRF18	Hs.212680	TNFRSF18	tumor necrosis factor receptor superfamily, member 18	HGNC:11914, AITR, GITR, GITR-D	TNF receptor superfamily activation-inducible protein; activation-inducible TNFR family receptor; glucocorticoid-induced TNFR-related protein	1p36.3	8784	21936
GITR-ligand/TNFSF18	Hs.248197	TNFSF18	tumor necrosis factor (ligand) superfamily, member 18	HGNC:11932, AITRL, GITRL, TL6, hGITRL	AITR ligand; GITR ligand; glucocorticoid-induced TNFR-related protein ligand	1q23	8995	240873
GM-CSF	Hs.1349	CSF2	colony stimulating factor 2 (granulocyte-macrophage)	HGNC:2434, GMCSF	colony stimulating factor 2; granulocyte-macrophage colony stimulating factor; molgramostin; sargramostim	5q31.1	1437	12981
GRO (GROb)	Hs.75765	CXCL2	chemokine (C-X-C motif) ligand 2	HGNC:4603, CINC-2a, GRO2, GROb, MGSA beta, MGSA-b, MIP-2a, MIP2, MIP2A, SCYB2	GRO2 oncogene; melanoma growth stimulatory activity beta	4q21	2920	20310
GRO-alpha	Hs.789	CXCL1	chemokine (C-X-C motif) ligand 1 (melanoma growth stimulating activity, alpha)	HGNC:4602, GRO1, GROa, MGSA, MGSA alpha, MGSA-a, NAP-3, SCYB1	GRO1 oncogene (melanoma growth stimulating activity, alpha); GRO1 oncogene (melanoma growth-stimulating activity); chemokine (C-X-C motif) ligand 1; melanoma growth stimulatory activity alpha	4q21	2919	14825
HCC-4/CCL16	Hs.10458	CCL16	chemokine (C-C motif) ligand 16	HGNC:10614, CKb12, HCC-4, ILINCK, LCC-1, LEC, LMC, MGC117051, Mtn-1, NCC-4, NCC4, SCYA16, SCYL4	IL-10-inducible chemokine; chemokine CC-4; chemokine LEC; liver CC chemokine-1 precursor; liver-expressed chemokine; lymphocyte and monocyte chemoattractant; monotactin-1; new CC chemokine 4; small inducible cytokine A16; small inducible cytokine subfamily A (Cys-Cys), member 16	17q11.2	6360		none
HGF	Hs.396530	HGF	hepatocyte growth factor (hepapoietin A; scatter factor)	HGNC:4893, F-TCF, HGFB, HPTA, SF	fibroblast-derived tumor cytotoxic factor; hepatocyte growth factor; hepatopoietin A; lung fibroblast-derived mitogen; scatter factor	7q21.1	3082	15234	weak similarity
I-309	Hs.72918	CCL1	chemokine (C-C motif) ligand 1	HGNC:10609, I-309, P500, SCYA1, SISe, TCA3	T lymphocyte-secreted protein I-309; inflammatory cytokine I-309; small inducible cytokine A1; small inducible cytokine A1 (I-309, homologous to mouse Tca-3)	17q12	6346	20290	weak similarity
ICAM-1	Hs.515126	ICAM1	intercellular adhesion molecule 1 (CD54), human rhinovirus receptor	HGNC:5344, BB2, CD54, P3.58	60 bp after segment 1; cell surface glycoprotein; cell surface glycoprotein P3.58; intercellular adhesion molecule 1	19p13.3-p13.2	3383	15894
ICAM-3	Hs.353214	ICAM3	intercellular adhesion molecule 3	HGNC:5346, CD50, CDW50, ICAM-R		19p13.3-p13.2	3385	15898	weak similarity
IFN-gamma	Hs.856	IFNG	interferon, gamma	HGNC:5438, IFG, IFI		12q14	3458	15978
IGF-1	Hs.160562	IGF1	insulin-like growth factor 1 (somatomedin C)	HGNC:5464, IGFI	insulin-like growth factor 1 (somatomedia C)	12q22-q23	3479	16000
IGF-1 SR / IGF-1R	Hs.20573	IGF1R	insulin-like growth factor 1 receptor	HGNC:5465, JTK13	clone 1900 unknown protein	15q26.3	3480	16001
IGFBP-1	Hs.401316	IGFBP1	insulin-like growth factor binding protein 1	HGNC:5469, AFBP, IBP1, IGF-BP25, PP12, hIGFBP-1	IGF-binding protein 1; alpha-pregnancy-associated endometrial globulin; amniotic fluid binding protein; binding protein-25; binding protein-26; binding protein-28; growth hormone independent-binding protein; placental protein 12	7p13-p12	3484	16006
IGFBP-2	Hs.438102	IGFBP2	insulin-like growth factor binding protein 2, 36kDa	HGNC:5471, IBP2, IGF-BP53	insulin-like growth factor binding protein 2 (36kD)	2q33-q34	3485	16008
IGFBP-3	Hs.450230	IGFBP3	insulin-like growth factor binding protein 3	HGNC:5472, BP-53, IBP3	IGF-binding protein 3; acid stable subunit of the 140 K IGF complex; binding protein 29; binding protein 53; growth hormone-dependent binding protein	7p13-p12	3486	16009
IGFBP-4	Hs.462998	IGFBP4	insulin-like growth factor binding protein 4	HGNC:5473, BP-4, HT29-IGFBP, IBP4, IGFBP-4	IGF-binding protein 4; insulin-like growth factor-binding protein 4	17q12-q21.1	3487	16010
IGFBP-6	Hs.274313	IGFBP6	insulin-like growth factor binding protein 6	HGNC:5475, IBP6	IGF binding protein 6	12q13	3489	16012
IL-1 R1	Hs.557403	IL1R1	interleukin 1 receptor, type I	HGNC:5993, CD121A, D2S1473, IL-1R-alpha, IL1R, IL1RA, P80	antigen CD121a; interleukin 1 receptor alpha, type I; interleukin receptor 1	2q12	3554	16177
IL-1 R4/ST2 ??	Hs.66	IL1RL1	interleukin 1 receptor-like 1	HGNC:5998, DER4, FIT-1, MGC32623, ST2, ST2L, ST2V, T1	homolog of mouse growth stimulation-expressed gene; interleukin 1 receptor-related protein	2q12	9173	17082	weak similarity
IL-10	Hs.193717	IL10	interleukin 10	HGNC:5962, CSIF, IL-10, IL10A, MGC126450, MGC126451, TGIF	cytokine synthesis inhibitory factor; interleukin 10	1q31-q32	3586	16153
IL-11	Hs.467304	IL11	interleukin 11	HGNC:5966, AGIF, IL-11	dipogenesis inhibitory factor; oprelvekin	19q13.3-q13.4	3589	16156
IL-12 p40	Hs.674	IL12B	interleukin 12B (natural killer cell stimulatory factor 2, cytotoxic lymphocyte maturation factor 2, p40)	HGNC:5970, CLMF, CLMF2, IL-12B, NKSF, NKSF2	IL12, subunit p40; cytotoxic lymphocyte maturation factor 2, p40; interleukin 12, p40; interleukin 12B; interleukin-12 beta chain; natural killer cell stimulatory factor, 40 kD subunit; natural killer cell stimulatory factor-2	5q31.1-q33.1	3593	16160
IL-12 p70 / IL-12 p35	Hs.673	IL12A	interleukin 12A (natural killer cell stimulatory factor 1, cytotoxic lymphocyte maturation factor 1, p35)	HGNC:5969, CLMF, IL-12A, NFSK, NKSF1	IL-12, subunit p35; NF cell stimulatory factor chain 1; cytotoxic lymphocyte maturation factor 1, p35; interleukin 12, p35; interleukin 12A; interleukin-12 alpha chain precursor; natural killer cell stimulatory factor 1, 35 kD subunit	3p12-q13.2	3592	16159
IL-13	Hs.845	IL13	interleukin 13	HGNC:5973, ALRH, IL-13, MGC116786, MGC116788, MGC116789, P600		5q31	3596	16163
IL-15	Hs.168132	IL15	interleukin 15	HGNC:5977, IL-15, MGC9721		4q31	3600	16168
IL-16	Hs.459095	IL16	interleukin 16	HGNC:5980, FLJ44234, HsT19289, IL-16, LCF, prIL-16	interleukin 16; lymphocyte chemoattractant factor	15q26.3	3603	16170
IL-17	Hs.41724	IL17	interleukin 17	HGNC:5981, CTLA8, IL-17, IL-17A	cytotoxic T-lymphocyte-associated antigen 8; cytotoxic T-lymphocyte-associated serine esterase 8; interleukin 17	6p12	3605	16171
IL-1-alpha	Hs.1722	IL1A	interleukin 1, alpha	HGNC:5991, IL-1A, IL1, IL1-ALPHA, IL1F1	IL1A (IL1F1); hematopoietin-1; preinterleukin 1 alpha; pro-interleukin-1-alpha	2q14	3552	16175
IL-1-beta	Hs.126256	IL1B	interleukin 1, beta	HGNC:5992, IL-1, IL1-BETA, IL1F2	catabolin; preinterleukin 1 beta; pro-interleukin-1-beta	2q14	3553	16176
IL-1-ra	Hs.81134	IL1RN	interleukin 1 receptor antagonist	HGNC:6000, ICIL-1RA, IL-1ra3, IL1F3, IL1RA, IRAP, MGC10430	IL1RN (IL1F3); intracellular IL-1 receptor antagonist type II; intracellular interleukin-1 receptor antagonist (icIL-1ra); type II interleukin-1 receptor antagonist	2q14.2	3557	16181
IL-2	Hs.89679	IL2	interleukin 2	HGNC:6001, IL-2, TCGF, lymphokine	T cell growth factor; aldesleukin; interleukin-2; involved in regulation of T-cell clonal expansion	4q26-q27	3558	16183
IL-2 R-alpha	Hs.231367	IL2RA	interleukin 2 receptor, alpha	HGNC:6008, CD25, IL2R, TCGFR	Interleukin-2 receptor; OTTHUMP00000044870; interleukin 2 receptor, alpha chain	10p15-p14	3559	16184
IL-3	Hs.694	IL3	interleukin 3	HGNC:6011, IL-3, MCGF, MGC79398, MGC79399, MULTI-CSF	P-cell stimulating factor; hematopoietic growth factor; interleukin 3; mast-cell growth factor; multilineage-colony-stimulating factor	5q31.1	3562	16187	weak similarity
IL-4	Hs.73917	IL4	interleukin 4	HGNC:6014, BSF1, IL-4, MGC79402	B_cell stimulatory factor 1; lymphocyte stimulatory factor 1	5q31.1	3565	16189
IL-5	Hs.2247	IL5	interleukin 5	HGNC:6016, EDF, IL-5, TRF	B cell differentiation factor I; T-cell replacing factor; eosinophil differentiation factor; interleukin 5; interleukin-5	5q31.1	3567	16191
IL-6	Hs.512234	IL6	interleukin 6 (interferon, beta 2)	HGNC:6018, BSF2, HGF, HSF, IFNB2, IL-6		7p21	3569	16193
IL-6 R	Hs.135087	IL6R	interleukin 6 receptor	HGNC:6019, CD126, IL-6R-1, IL-6R-alpha, IL6RA, MGC104991	CD126 antigen; interleukin 6 receptor alpha subunit	1q21	3570	16194
IL-7	Hs.536926	IL7	interleukin 7	HGNC:6023, IL-7		8q12-q13	3574	16196
IL-8	Hs.624	IL8	interleukin 8	HGNC:6025, 3-10C, AMCF-I, CXCL8, GCP-1, GCP1, IL-8, K60, LECT, LUCT, LYNAP, MDNCF, MONAP, NAF, NAP-1, NAP1, SCYB8, TSG-1, b-ENAP	CXC chemokine ligand 8; LUCT/interleukin-8; T cell chemotactic factor; beta-thromboglobulin-like protein; emoctakin; granulocyte chemotactic protein 1; lymphocyte-derived neutrophil-activating factor; monocyte derived neutrophil-activating protein; monocyte-derived neutrophil chemotactic factor; neutrophil-activating factor; neutrophil-activating peptide 1; neutrophil-activating protein 1; protei…	4q13-q21	3576		none
I-TAC	Hs.518814	CXCL11	hemokine (C-X-C motif) ligand 11	HGNC:10638, H174, I-TAC, IP-9, IP9, SCYB11, SCYB9B, b-R1	small inducible cytokine B11; small inducible cytokine subfamily B (Cys-X-Cys), member 11; small inducible cytokine subfamily B (Cys-X-Cys), member 9B	4q21.2	6373	56066	weak similarity
Leptin / OB	Hs.194236	LEP	leptin (obesity homolog, mouse)	HGNC:6553, OB, OBS	leptin; leptin (murine obesity homolog); obesity; obesity (murine homolog, leptin)	7q31.3	3952	16846
LIGHT / TNFSF14	Hs.129708	TNFSF14	tumor necrosis factor (ligand) superfamily, member 14	HGNC:11930, HVEML, LIGHT, LTg, TR2	delta transmembrane LIGHT; herpesvirus entry mediator A; ligand for herpesvirus entry mediator; tumor necrosis factor ligand superfamily, member 14; tumor necrosis factor receptor-like 2; tumor necrosis factor superfamily member LIGHT	19p13.3	8740	50930
Lymphotactin / XCL1	Hs.546295	XCL1	chemokine (C motif) ligand 1	HGNC:10645, ATAC, LPTN, LTN, SCM-1, SCM-1a, SCM1, SCYC1	OTTHUMP00000060404; lymphotactin; small inducible cytokine subfamily C, member 1 (lymphotactin)	1q23	6375	16963
MCP-1	Hs.303649	CCL2	chemokine (C-C motif) ligand 2	HGNC:10618, GDCF-2, GDCF-2 HC11, HC11, HSMCR30, MCAF, MCP-1, MCP1, MGC9434, SCYA2, SMC-CF	monocyte chemoattractant protein-1; monocyte chemotactic and activating factor; monocyte chemotactic protein 1, homologous to mouse Sig-je; monocyte secretory protein JE; small inducible cytokine A2; small inducible cytokine A2 (monocyte chemotactic protein 1, homologous to mouse Sig-je); small inducible cytokine subfamily A (Cys-Cys), member 2	17q11.2-q21.1	6347	20296
MCP-2	Hs.271387	CCL8	chemokine (C-C motif) ligand 8	HGNC:10635, HC14, MCP-2, MCP2, SCYA10, SCYA8	monocyte chemoattractant protein 2; monocyte chemotactic protein 2; small inducible cytokine A8; small inducible cytokine subfamily A (Cys-Cys), member 8; small inducible cytokine subfamily A (Cys-Cys), member 8 (monocyte chemotactic protein 2)	17q11.2	6355	20307	weak similarity
MCP-3	Hs.251526	CCL7	chemokine (C-C motif) ligand 7	HGNC:10634, FIC, MARC, MCP-3, MCP3, NC28, SCYA6, SCYA7	monocyte chemoattractant protein 3; monocyte chemotactic protein 3; small inducible cytokine A7; small inducible cytokine A7 (monocyte chemotactic protein 3)	17q11.2-q12	6354	20306
MCP-4	Hs.414629	CCL13	chemokine (C-C motif) ligand 13	HGNC:10611, CKb10, MCP-4, MGC17134, NCC-1, NCC1, SCYA13, SCYL1	CK-beta-10; monocyte chemoattractant protein 4; monocyte chemotactic protein 4; new CC chemokine 1; small inducible cytokine A13; small inducible cytokine subfamily A (Cys-Cys), member 13	17q11.2	6357	20293
M-CSF	Hs.173894	CSF1	colony stimulating factor 1 (macrophage)	HGNC:2432, MCSF, MGC31930	colony stimulating factor 1; macrophage colony stimulating factor	1p21-p13	1435	12977
MDC	Hs.534347	CCL22	chemokine (C-C motif) ligand 22	HGNC:10621, A-152E5.1, ABCD-1, DC/B-CK, MDC, MGC34554, SCYA22, STCP-1	CC chemokine STCP-1; macrophage-derived chemokine; small inducible cytokine A22; small inducible cytokine subfamily A (Cys-Cys), member 22; stimulated T cell chemotactic protein 1	16q13	6367	20299
MIF	Hs.407995	MIF	macrophage migration inhibitory factor (glycosylation-inhibiting factor)	HGNC:7097, GIF, GLIF, MMIF	glycosylation-inhibiting factor; phenylpyruvate tautomerase	22q11.23	4282	17319
MIG	Hs.77367	CXCL9	chemokine (C-X-C motif) ligand 9	HGNC:7098, CMK, Humig, MIG, SCYB9, crg-10	monokine induced by gamma interferon; small inducible cytokine B9	4q21	4283	17329
MIP-1-alpha	Hs.514107	CCL3	chemokine (C-C motif) ligand 3	HGNC:10627, G0S19-1, LD78ALPHA, MIP-1-alpha, MIP1A, SCYA3	LD78 alpha beta; Small inducible cytokine A3; small inducible cytokine A3 (homologous to mouse Mip-1a)	17q11-q21	6348	20302
MIP-1-beta	Hs.75703	CCL4	chemokine (C-C motif) ligand 4	HGNC:10630, ACT2, AT744.1, Act-2, G-26, LAG1, MIP-1-beta, MIP1B, SCYA2, SCYA4, cytokine	chemokine C-C motif ligand 4; lymphocyte-activation gene 1; secreted protein G-26; small inducible cytokine A4; small inducible cytokine A4 (homologous to mouse Mip-1b)	17q12	6351	20303
MIP-1-delta	Hs.272493	CCL15	chemokine (C-C motif) ligand 15	HGNC:10613, HCC-2, HMRP-2B, LKN1, Lkn-1, MIP-1d, MIP-5, NCC-3, NCC3, SCYA15, SCYL3, SY15	MIP-1 delta; chemokine CC-2; leukotactin 1; macrophage inflammatory protein 5; new CC chemokine 3; small inducible cytokine subfamily A (Cys-Cys), member 15	17q11.2	6359		none
MIP-3-alpha	Hs.75498	CCL20	chemokine (C-C motif) ligand 20	HGNC:10619, CKb4, LARC, MIP-3a, MIP3A, SCYA20, ST38	exodus-1; macrophage inflammatory protein 3 alpha; small inducible cytokine subfamily A (Cys-Cys), member 20	2q33-q37	6364	20297
MIP-3-beta	Hs.50002	CCL19	chemokine (C-C motif) ligand 19	HGNC:10617, CKb11, ELC, MGC34433, MIP-3b, MIP3B, SCYA19	CC chemokine ligand 19; CK beta-11; EBI1-ligand chemokine; OTTHUMP00000000531; beta chemokine exodus-3; exodus-3; macrophage inflammatory protein 3-beta; small inducible cytokine A19; small inducible cytokine subfamily A (Cys-Cys), member 19	9p13	6363	24047
MSP-alpha	Hs.512587	MST1	macrophage stimulating 1 (hepatocyte growth factor-like)	HGNC:7380, D3F15S2, DNF15S2, HGFL, MSP, NF15S2	hepatocyte growth factor-like protein homolog	3p21	4485	15235
NAP-2	Hs.2164	CXCL7 / PPBP	pro-platelet basic protein (chemokine (C-X-C motif) ligand 7)	HGNC:9240, B-TG1, Beta-TG, CTAP3, CTAPIII, CXCL7, LA-PF4, LDGF, MDGF, NAP-2, NAP-2-L1, PBP, SCYB7, TC1, TC2, TGB, TGB1, THBGB, THBGB1	CXC chemokine ligand 7; beta-thromboglobulin; connective tissue-activating peptide III; low-affinity platelet factor IV; neutrophil-activating peptide-2; pro-platelet basic protein; pro-platelet basic protein (includes platelet basic protein, beta-thromboglobulin, connective tissue-activating peptide III, neutrophil-activating peptide-2); small inducible cytokine B7; small inducible cytokine subf…	4q12-q13	5473	57349
NT-3	Hs.99171	NTF3	neurotrophin 3	HGNC:8023, HDNF, NGF-2, NGF2, NT3		12p13	4908	18205
NT-4	Hs.266902	NTF5	neurotrophin 5 (neurotrophin 4/5)	HGNC:8024, NT-4/5, NT4, NT5, NTF4	neurotrophic factor 4; neurotrophic factor 5; neurotrophin 4; neurotrophin 5	19q13.3	4909	78405
Oncostatin M	Hs.248156	OSM	oncostatin M	HGNC:8506, MGC20461		22q12.2	5008	18413
Osteoprotegerin	Hs.81791	TNFRSF11B	tumor necrosis factor receptor superfamily, member 11b (osteoprotegerin)	HGNC:11909, MGC29565, OCIF, OPG, TR1	osteoclastogenesis inhibitory factor; osteoprotegerin	8q24	4982	18383
PARC	Hs.143961	CCL18	chemokine (C-C motif) ligand 18 (pulmonary and activation-regulated)	HGNC:10616, AMAC-1, AMAC1, CKb7, DC-CK1, DCCK1, MIP-4, PARC, SCYA18	CC chemokine ligand 18; alternative macrophage activation-associated CC chemokine 1; chemokine (C-C), dendritic; dendritic cell chemokine 1; macrophage inflammatory protein 4; pulmonary and activation-regulated chemokine; small inducible cytokine A18; small inducible cytokine subfamily A (Cys-Cys), member 18; small inducible cytokine subfamily A (Cys-Cys), member 18, pulmonary and activation-regu…	17q11.2	6362		none
PDGFB / PDGF-BB	Hs.1976	PDGFB	platelet-derived growth factor beta polypeptide (simian sarcoma viral (v-sis) oncogene homolog)	HGNC:8800, PDGF2, SIS, SSV, c-sis	HUMANES PDGF-B GEN AUS PGEM2-PDGF-B, FLANKIERT VON 5'-ECORI UND 3'-HINDIII RESTRIKTIONSSCHNITTSTELLEN; PDGF, B chain; PDGF-B VORLAEUFERSEQUENZ; Platelet-derived growth factor, beta polypeptide (oncogene SIS); becaplermin; oncogene SIS; platelet-derived growth factor 2; platelet-derived growth factor beta; platelet-derived growth factor, B chain; v-sis platelet-derived growth factor beta polypepti…	22q13.1	5155	18591	weak similarity
PIGF	Hs.468415	PIGF	phosphatidylinositol glycan, class F	HGNC:8962, MGC32646, MGC33136		2p21-p16	5281	18701
RANTES	Hs.514821	CCL5	chemokine (C-C motif) ligand 5	HGNC:10632, D17S136E, MGC17164, RANTES, SCYA5, SISd, TCP228	SIS-delta; T-cell specific RANTES protein; T-cell specific protein p288; beta-chemokine RANTES precursor; regulated upon activation, normally T-expressed, and presumably secreted; small inducible cytokine A5; small inducible cytokine A5 (RANTES); small inducible cytokine subfamily A (Cys-Cys), member 5	17q11.2-q12	6352	20304
SCF	Hs.1048	KITLG	KIT ligand	HGNC:6343, DKFZp686F2250, KL-1, Kitl, MGF, SCF, SF	mast cell growth factor; steel factor; stem cell factor precursor	12q22	4254	17311
SDF-1	Hs.522891	CXCL12	chemokine (C-X-C motif) ligand 12 (stromal cell-derived factor 1)	HGNC:10672, PBSF, SCYB12, SDF-1a, SDF-1b, SDF1, SDF1A, SDF1B, TLSF-a, TLSF-b, TPAR1, chemokine	stromal cell-derived factor 1; stromal cell-derived factor 1 gamma; stromal cell-derived factor 1a	10q11.1	6387	20315
sgp130	Hs.532082	IL6ST	interleukin 6 signal transducer (gp130, oncostatin M receptor)	HGNC:6021, CD130, CDw130, GP130, GP130-RAPS, IL6R-beta	CD130 antigen; gp130 of the rheumatoid arthritis antigenic peptide-bearing soluble form; gp130 transducer chain; interleukin 6 signal transducer; interleukin receptor beta chain; membrane glycoprotein gp130; oncostatin M receptor	5q11	3572	16195
sTNF RI	Hs.279594	TNFRSF1A	tumor necrosis factor receptor superfamily, member 1A	HGNC:11916, CD120a, FPF, MGC19588, TBP1, TNF-R, TNF-R-I, TNF-R55, TNFAR, TNFR1, TNFR55, TNFR60, p55, p55-R, p60	tumor necrosis factor binding protein 1; tumor necrosis factor receptor 1; tumor necrosis factor receptor type 1; tumor necrosis factor-alpha receptor	12p13.2	7132	21937
sTNF RII	Hs.256278	TNFRSF1B	tumor necrosis factor receptor superfamily, member 1B	HGNC:11917, CD120b, TBPII, TNF-R-II, TNF-R75, TNFBR, TNFR2, TNFR80, p75, p75TNFR	p75 TNF receptor; tumor necrosis factor beta receptor; tumor necrosis factor binding protein 2; tumor necrosis factor receptor 2	1p36.3-p36.2	7133	21938
TARC	Hs.546294	CCL17	chemokine (C-C motif) ligand 17	HGNC:10615, A-152E5.3, ABCD-2, SCYA17, TARC	T cell-directed CC chemokine; small inducible cytokine A17; small inducible cytokine subfamily A (Cys-Cys), member 17; thymus and activation-regulated chemokine	16q13	6361	20295
TECK	Hs.310511	CCL25	chemokine (C-C motif) ligand 25	HGNC:10624, Ckb15, SCYA25, TECK	Ck beta-15; TECKvar; chemokine TECK; small inducible cytokine A25; small inducible cytokine subfamily A (Cys-Cys), member 25; thymus expressed chemokine	19p13.2	6370	20300
TGF-beta-1 / LAP	Hs.1103	TGFB1	transforming growth factor, beta 1 (Camurati-Engelmann disease)	HGNC:11766, CED, DPD1, TGFB	TGF-beta 1 protein; diaphyseal dysplasia 1, progressive; transforming growth factor beta 1; transforming growth factor, beta 1; transforming growth factor-beta 1	19q13.1	7040	21803
TGF-beta-3	Hs.2025	TGFB3	transforming growth factor, beta 3	HGNC:11769, TGF-beta3	transforming growth factor-beta 3	14q24	7043	21809
Thrombopoietin	Hs.1166	THPO	thrombopoietin (myeloproliferative leukemia virus oncogene ligand, megakaryocyte growth and development factor)	HGNC:11795, MGDF, MKCSF, ML, MPLLG, TPO	MPL ligand; c-mpl ligand; megakaryocyte colony-stimulating factor; megakaryocyte growth and development factor; megakaryocyte stimulating factor; myeloproliferative leukemia virus oncogene ligand; thrombopoietin	3q27	7066	21832	weak similarity
TIMP-1	Hs.522632	TIMP1	TIMP metallopeptidase inhibitor 1	HGNC:11820, CLGI, EPA, EPO, FLJ90373, HCI, TIMP	erythroid potentiating activity; fibroblast collagenase inhibitor; tissue inhibitor of metalloproteinase 1; tissue inhibitor of metalloproteinase 1 (erythroid potentiating activity, collagenase inhibitor)	Xp11.3-p11.23	7076	21857
TIMP-2	Hs.104839	TIMP2	TIMP metallopeptidase inhibitor 2	HGNC:11821, CSC-21K	tissue inhibitor of metalloproteinase 2; tissue inhibitor of metalloproteinase 2 precursor; tissue inhibitor of metalloproteinases 2	17q25	7077	21858
TNF-alpha	Hs.241570	TNF	tumor necrosis factor (TNF superfamily, member 2)	HGNC:11892, DIF, TNF-alpha, TNFA, TNFSF2	APC1 protein; OTTHUMP00000037669; TNF superfamily, member 2; TNF, macrophage-derived; TNF, monocyte-derived; cachectin; tumor necrosis factor alpha	6p21.3	7124	21926
TNF-beta	Hs.36	LTA	lymphotoxin alpha (TNF superfamily, member 1)	HGNC:6709, LT, TNFB, TNFSF1	OTTHUMP00000037612; OTTHUMP00000037613; lymphotoxin alpha; tumor necrosis factor beta	6p21.3	4049	16992
TRAIL-R3	Hs.119684	TNFRSF10C	tumor necrosis factor receptor superfamily, member 10c, decoy without an intracellular domain	HGNC:11906, DCR1, LIT, TRAILR3, TRID	TNF related TRAIL receptor; TNF related apoptosis-inducing ligand receptor 3; TRAIL receptor 3; antagonist decoy receptor for TRAIL/Apo-2L; decoy receptor 1; decoy without an intracellular domain; lymphocyte inhibitor of TRAIL; tumor necrosis factor receptor superfamily, member 10c	8p22-p21	8794		none
TRAIL-R4	Hs.213467	TNFRSF10D	tumor necrosis factor receptor superfamily, member 10d, decoy with truncated death domain	HGNC:11907, DCR2, TRAILR4, TRUNDD	TNF receptor-related receptor for TRAIL; TRAIL receptor 4; TRAIL receptor with a truncated death domain; decoy receptor 2; decoy with truncated death domain; tumor necrosis factor receptor superfamily, member 10d	8p21	8793		none
uPAR	Hs.77274	PLAU	plasminogen activator, urokinase	HGNC:9052, ATF, UPA, URK, u-PA	U-plasminogen activator; antagonist of uPA; plasminogen activator, urinary; urokinase plasminogen activator; urokinase-type plasminogen activator amino-terminal fragment; urokinase-type plasminogen activator precursor	10q24	5328	18792
VEGF	Hs.73793	VEGF	vascular endothelial growth factor	HGNC:12680, MGC70609, VEGFA, VPF	vascular endothelial growth factor A; vascular permeability factor	6p12	7422	22339
VEGF-D	Hs.11392	FIGF	c-fos induced growth factor (vascular endothelial growth factor D)	HGNC:3708, VEGF-D, VEGFD	vascular endothelial growth factor D	Xp22.31	2277	14205

## Sheet: Mouse gene IDs + human ortholog
S02 SUPPLEMENTAL TABLE 2
B. MOUSE PROTEINS INTERROGATED BY ARRAYS: 62 proteins (Chemicon; Mouse cat #AA1003M-8)								HUMAN HOMOLOGUE
classification for "mus musculus", from pubmed/unigene data base								HUMAN HOMOLOGUE
								HUMAN
Array GENE NAME	UNIGENE	Official Symbol	stands for	Other Aliases:	Other Designations:	Chromosome Location	Gene ID	Gene ID	comment
Axl	Mm.4128	Axl	AXL receptor tyrosine kinase	MGI:1347244, AI323647, Ark, Tyro7, Ufo	ufo oncogene homolog	7 6.0 cM	26362	558
BLC / CXCL13	Mm.10116	Cxcl13	chemokine (C-X-C motif) ligand 13	MGI:1888499, ANGIE2, Angie, BCA-1, BLC, BLR1L, Scyb13	B lymphocyte chemoattractant; small inducible cytokine subfamily B (Cys-X-Cys), member 13	5 E3	55985	10563
CD30L / TNFSF8	Mm.4664	Tnfsf8	tumor necrosis factor (ligand) superfamily, member 8	MGI:88328, CD153, CD30LG, Cd30l		4 32.2 cM	21949	944
CD30T	Mm.12810	Tnfrsf8	tumor necrosis factor receptor superfamily, member 8	MGI:99908, Cd30, D1S166E, Ki, Ki-1		4 75.5 cM	21941	943
CD40 / TNFSF5	Mm.4861	Tnfsf5	CD40 ligand	MGI:88337, CD154, Cd40l, HIGM1, IGM, IMD3, Ly-62, Ly62, T-BAM, TRAP, Tnfsf5, gp39	tumor necrosis factor (ligand) superfamily, member 5	X 18.0 cM	21947	959
CRG-2 / CXCL10 / IP-10	Mm.877	Cxcl10	chemokine (C-X-C motif) ligand 10	MGI:1352450, C7, CRG-2, INP10, IP-10, IP10, Ifi10, Scyb10, gIP-10, mob-1	interferon activated gene 10; small inducible cytokine B subfamily (Cys-X-Cys), member 10	5 53.0 cM	15945	3627
CTACK	Mm.373540	Ccl27	chemokine (C-C motif) ligand 27	MGI:1343459, ALP, AW558992, CTACK, CTAK, ESkine, MGC130150, PESKY, Scya27, mILC, skinkine	small inducible cytokine A27	4 A5	20301	10850
CXCL16	Mm.425692	Cxcl16	chemokine (C-X-C motif) ligand 16	MGI:1932682, 0910001K24Rik, AV290116, BB024863, SR-PSOX	Cxc chemokine ligand 16; SR-PSOX/CXCL16; Scavenger Receptor	11 B4	66102	58191
Eotaxin / CCL11	Mm.4686	Ccl11	small chemokine (C-C motif) ligand 11	MGI:103576, Scya11, eotaxin	small inducible cytokine A11	11 47.0 cM	20292	6356
Eotaxin-2 / CCL24	Mm.31505	Ccl24	chemokine (C-C motif) ligand 24	MGI:1928953, CKb-6, MPIF-2, Scya24	CC chemokine CCL24; eotaxin-2; small inducible cytokine A24	5 G1	56221	6369
Fas Ligand / TNFSF6	Mm.3355	Fasl	Fas ligand (TNF superfamily, member 6)	MGI:99255, APT1LG1, CD178, CD95L, Fas-L, Fas-Ligand, Tnfsf6, gld	Fas antigen ligand; generalized lymphoproliferative disease; tumor necrosis factor (ligand) superfamily, member 6	1 85.0 cM	14103	356
Fractalkine / CX3CL1	Mm.103711	Cx3cl1	chemokine (C-X3-C motif) ligand 1	MGI:1097153, AB030188, ABCD-3, AI848747, CX3C, Cxc3, D8Bwg0439e, Scyd1	fractalkine; neurotactin; small inducible cytokine subfamily D, 1	8 46.0 cM	20312	6376
GCSF / CSF3	Mm.1238	Csf3	colony stimulating factor 3 (granulocyte)	MGI:1339751, Csfg, G-CSF	colony stimulating factor 3	11 57.0 cM	12985	1440
GM-CSF / CSF2	Mm.4922	Csf2	colony stimulating factor 2 (granulocyte-macrophage)	MGI:1339752, Csfgm, Gm-CSf	colony stimulating factor 2; put. GM-CSF	11 29.5 cM	12981	1437
IFN-gamma	Mm.240327	Ifng	interferon gamma	MGI:107656, IFN-g, IFN-gamma, Ifg		10 67.0 cM	15978	3458
IGFBP-3	Mm.29254	Igfbp3	insulin-like growth factor binding protein 3	MGI:96438, AI649005, IGFBP-3, IGgfbp3		11 1.35 cM	16009	3486
IGFBP-5	Mm.309617	Igfbp5	insulin-like growth factor binding protein 5	MGI:96440, AI256729, AW208790, IGFBP-5		1 36.1 cM	16011	3488
IGFBP-6	Mm.358609	Igfbp6	insulin-like growth factor binding protein 6	MGI:96441, IGFBP-6		15 F3	16012	3489
IL-10	Mm.874	Il10	interleukin 10	MGI:96537, CSIF, Il-10	cytokine synthesis inhibitory factor	1 69.9 cM	16153	3586
IL-12 p40/p70	Mm.239707	Il12b	interleukin 12b	MGI:96540, Il-12b, Il-12p40, Il12p40, p40	IL-12 p40	11 19.0 cM	16160	3593
IL-12 p70 (IL12p35)	Mm.103783	Il12a	interleukin 12a	MGI:96539, IL-12p35, Il-12a, Ll12a, p35	interleukin 12a p35 subunit	3 37.0 cM	16159	3592
IL-13	Mm.1284	Il13	interleukin 13	MGI:96541, Il-13		11 29.0 cM	16163	3596
IL-17	Mm.5419	Il17	interleukin 17	MGI:107364, Ctla-8, Ctla8		1 A	16171	3605
IL-1a	Mm.15534	Il1a	interleukin 1 alpha	MGI:96542, Il-1a		2 73.0 cM	16175	3552
IL-1b	Mm.222830	Il1b	interleukin 1 beta	MGI:96543, IL-1beta, Il-1b	interleukin 1, beta	2 73.0 cM	16176	3553
IL-2	Mm.14190	Il2	interleukin 2	MGI:96548, Il-2, cytokine	interleukin-2	3 19.2 cM	16183	3558
IL-3	Mm.983	Il3	interleukin 3	MGI:96552, Csfmu, Il-3		11 28.5 cM	16187	3562	weak similarity
IL-3Rb	Mm.235324	Csf2rb1	colony stimulating factor 2 receptor, beta 1, low-affinity (granulocyte-macrophage)	MGI:1339759, AI848964, AIC2B, Bc, CDw131, Csfgmrb, Il3r, Il3rb, Il3rb1, Il5rb, MGC130522	beta c; common beta chain	15 43.3 cM	12983	1439
IL-4	Mm.276360	Il4	interleukin 4	MGI:96556, IgG1, Il-4		11 29.0 cM	16189	3565
IL-5	Mm.4461	Il5	interleukin 5	MGI:96557, Il-5		11 29.2 cM	16191	3567
IL-6	Mm.1019	Il6	interleukin 6	MGI:96559, Il-6		5 17.0 cM	16193	3569
IL-9	Mm.3006	Il9	interleukin 9	MGI:96563, Il-9		13 35.0 cM	16198	3578
KC / CXCL1	Mm.21013	Cxcl1	chemokine (C-X-C motif) ligand 1	MGI:108068, Fsp, Gro1, KC, Mgsa, N51, Scyb1, gro	GRO1 oncogene	5 51.0 cM	14825	2919
Leptin	Mm.277072	Lep	leptin	MGI:104663, ob, obese		6 10.5 cM	16846	3952
Leptin R	Mm.259282	Lepr	leptin receptor	MGI:104993, LEPROT, MGC105189, OB-RGRP, Obr, db, diabetes, obese-like, obl	OB receptor; leptin receptor gene-related protein	4 46.7 cM	16847	3953
LIX / CXCL5 / ENA-78	Mm.4660	Cxcl5	chemokine (C-X-C motif) ligand 5	MGI:1096868, AMCF-II, ENA-78, GCP-2, LIX, Scyb5, Scyb6, chemokine	granulocyte chemotactic protein-2; small inducible cytokine B subfamily, member 5; small inducible cytokine subfamily B, member 15	5 53.0 cM	20311	6374
L-Selectin / CD62L	Mm.1461	Sell	selectin, lymphocyte	MGI:98279, AI528707, CD62L, L-selectin, LECAM-1, Lnhr, Ly-22, Ly-m22, Lyam-1, Lyam1		1 86.6 cM	20343	6402
Lymphotactin / XCL1	Mm.190	Xcl1	chemokine (C motif) ligand 1	MGI:104593, AI661682, ATAC, LTN, Lptn, SCM-1, SCM-1a, Scyc1	lymphotactin; small inducible cytokine subfamily C, member 1 (lymphotactin)	1 87.0 cM	16963	6375
MCP1 / CCL2	Mm.290320	Ccl2	chemokine (C-C motif) ligand 2	MGI:98259, AI323594, HC11, JE, MCAF, MCP-1, MCP1, SMC-CF, Scya2, Sigje	monocyte chemoattractant protein-1; monocyte chemotactic protein; small inducible cytokine A2	11 46.5 cM	20296	6347
MCP5 / CCL12	Mm.867	Ccl12	chemokine (C-C motif) ligand 12	MGI:108224, MCP-5, Scya12	small inducible cytokine A12	11 47.0 cM	20293		none or discontinued
MCSF / CSF1	Mm.795	Csf1	colony stimulating factor 1 (macrophage)	MGI:1339753, C87615, CSF-1, Csfm, M-CSF, op	colony stimulating factor 1; colony-stimulating factor-1; osteopetrosis	3 51.0 cM	12977	1435
MIG / CXCL9	Mm.766	Cxcl9	chemokine (C-X-C motif) ligand 9	MGI:1352449, BB139920, CMK, Mig, Scyb9, crg-10	gamma interferon-induced monokine; monokine induced by gamma interferon; small inducible cytokine B subfamily (Cys-X-Cys), member 9	5 53.0 cM	17329	4283
MIP-1a / CCL3	Mm.1282	Ccl3	chemokine (C-C motif) ligand 3	MGI:98260, AI323804, G0S19-1, LD78alpha, MIP-1alpha, MIP1-(a), MIP1-alpha, Mip1a, Scya3	MIP-1 alpha; MIP1 (a); macrophage inflammatory protein-1alpha; small inducible cytokine A3	11 47.59 cM	20302	6348
MIP-1g / CCL9	Mm.2271	Ccl9	chemokine (C-C motif) ligand 9	MGI:104533, CCF18, MRP-2, Scya10, Scya9	MIP-1 gamma; small inducible cytokine A10; small inducible cytokine A9	11 47.4 cM	20308		discontinued
MIP-2 / CXCL2	Mm.4979	Cxcl2	chemokine (C-X-C motif) ligand 2	MGI:1340094, CINC-2a, GROb, Gro2, MIP-2, MIP-2a, Mgsa-b, Mip2, Scyb, Scyb2	small inducible cytokine subfamily, member 2	5 51.0 cM	20310	2920
MIP-3a / CCL20	Mm.116739	Ccl20	chemokine (C-C motif) ligand 20	MGI:1329031, CKb4, LARC, MIP-3A, MIP-3[a], MIP3A, ST38, Scya20, exodus-1	small inducible cytokine subfamily A20	1 52.0 cM	20297	6364
MIP-3b / CCL19	Mm.379051	Ccl19	chemokine (C-C motif) ligand 19	MGI:1346316, CKb11, ELC, MIP3B, Scya19, exodus-3	EBI-1 ligand chemokine; EBV-induced molecule 1 ligand chemokine; attracts mature dendritic cells and naive T cells; chemokine CCL19; small inducible cytokine A19	4 A5	24047	6363
PF-4 / CXCL4	Mm.332490	Cxcl4	chemokine (C-X-C motif) ligand 4	MGI:1888711, Pf4, Scyb4	platelet factor 4	5 E2	56744	5196	weak similarity
P-Selectin / CD62	Mm.3337	Selp	selectin, platelet	MGI:98280, CD62P, Grmp, MGC129336, MGC129337, P-selectin, PADGEM	P selectin	1 86.6 cM	20344	6403
RANTES / CCL5	Mm.284248	Ccl5	chemokine (C-C motif) ligand 5	MGI:98262, MuRantes, RANTES, SISd, Scya5, TCP228	small inducible cytokine A5	11 47.4 cM	20304	6352
SCF / KitL	Mm.45124	Kitl	kit ligand	MGI:96974, Clo, Con, Gb, Mgf, SCF, SF, SLF, Sl, Steel, contrasted	Steel factor; cloud gray; grizzle-belly; mast cell growth factor; stem cell factor	10 57.0 cM	17311	4254
SDF-1a / CXCL12	Mm.303231	Cxcl12	chemokine (C-X-C motif) ligand 12	MGI:103556, AI174028, PBSF, PBSF/SDF-1, SDF-1, Scyb12, Sdf1, Sdf1a, Sdf1b, TLSF, TLSF-a, TLSF-b, TPAR1	pre-B-cell growth-stimulating factor; stromal cell derived factor 1	6 53.0 cM	20315	6387
sTNF RI	Mm.1258	Tnfrsf1a	tumor necrosis factor receptor superfamily, member 1a	MGI:1314884, CD120a, FPF, TNF-R, TNF-R-I, TNF-R1, TNF-R55, TNFAR, TNFR60, TNFRp55, Tnfr-2, Tnfr1, p55, p55-R	TNF receptor alpha chain	6 60.55 cM	21937	7132
sTNF RII	Mm.235328	Tnfrsf1b	tumor necrosis factor receptor superfamily, member 1b	MGI:1314883, CD120b, TNF-R-II, TNF-R2, TNF-R75, TNFBR, TNFR80, Tnfr-1, Tnfr2, p75	TNF receptor beta chain; p75 TNFR	4 75.5 cM	21938	7133
TARC / CCL17	Mm.41988	Ccl17	chemokine (C-C motif) ligand 17	MGI:1329039, ABCD-2, Scya17, Scya17l, TARC	small inducible cytokine subfamily A17; small inducible cytokine subfamily A17-like	8 45.0 cM	20295	6361
TCA-3 / CCL1	Mm.1283	Ccl1	chemokine (C-C motif) ligand 1	MGI:98258, BF534335, I-309, Scya1, Tca-3	CCR8 ligand; small inducible cytokine A1	11 47.32 cM	20290	6346	weak similarity
TECK / CCL25	Mm.7275	Ccl25	chemokine (C-C motif) ligand 25	MGI:1099448, AI852536, CKb15, Scya25, TECK	small inducible cytokine A25	8 1.0 cM	20300	6370
TIMP-1	Mm.8245	Timp1	tissue inhibitor of metalloproteinase 1	MGI:98752, Clgi, MGC7143, TIMP-1, Timp	long ORF (AA 1-205); tissue inhibitor of metalloproteinase-1	X 6.2 cM	21857	7076
TNF-alpha	Mm.1293	Tnf	tumor necrosis factor	MGI:104798, DIF, TNF-alpha, TNFSF2, TNFalpha, Tnfa, Tnfsf1a, cytokine	TNF alpha; tumor necrosis factor alpha; tumor necrosis factor-alpha	17 19.06 cM	21926	7124
TPO / Thrombopoietin	Mm.3943	Thpo	thrombopoietin	MGI:101875, Mpllg, TPO, TPO-1, TPO-2, TPO-3, TPO-4	myeloproliferative leukemia virus oncogene ligand	16 13.8 cM	21832	7066
VCAM-1	Mm.76649	Vcam1	vascular cell adhesion molecule 1	MGI:98926, CD106, Vcam-1		3 50.8 cM	22329	7412
VEGF	Mm.282184	Vegfa	vascular endothelial growth factor A	MGI:103178, VEGF-A, VEGF120, VPF, Vegf	vascular permeability factor	17 24.2 cM	22339	7422
